# Supplementary material for: Novel Flurbiprofen Derivatives as Antioxidant and Anti-Inflammatory Agents: Synthesis, In Silico, and In Vitro Biological Evaluation
Source: MDPI journal article supplement (doi:10.3390/molecules29020385), 2024-01-12
Supplement: s1 [file s1]

## **Supplementary Materials:**

### **Novel Flurbiprofen Derivatives as Antioxidant and Anti-inflammatory Agents: Synthesis, In silico, and In vitro Biological Evaluation**

**Iliyan Ivanov<sup>1\*</sup>, Stanimir Manolov<sup>1\*</sup>, Dimitar Bojilov<sup>1</sup>, Gabriel Marc<sup>2</sup>, Diyana Dimitrova<sup>1</sup>, Smaranda Oniga<sup>3</sup>, Ovidiu Oniga<sup>2</sup>, Paraskev Nedialkov<sup>4</sup> and Maria Stoyanova<sup>1</sup>**

#### **Table of Contents:**

|                                                                       |                |
|-----------------------------------------------------------------------|----------------|
| <b>Figure S1.</b> <sup>1</sup> H-NMR spectrum of compound <b>4a</b>   | <b>page 3</b>  |
| <b>Figure S2.</b> <sup>1</sup> H-NMR spectrum of compound <b>4b</b>   | <b>page 4</b>  |
| <b>Figure S3.</b> <sup>1</sup> H-NMR spectrum of compound <b>4c</b>   | <b>page 5</b>  |
| <b>Figure S4.</b> <sup>1</sup> H-NMR spectrum of compound <b>4d</b>   | <b>page 6</b>  |
| <b>Figure S5.</b> <sup>1</sup> H-NMR spectrum of compound <b>4e</b>   | <b>page 7</b>  |
| <b>Figure S6.</b> <sup>13</sup> C-NMR spectrum of compound <b>4a</b>  | <b>page 8</b>  |
| <b>Figure S7.</b> <sup>13</sup> C-NMR spectrum of compound <b>4b</b>  | <b>page 9</b>  |
| <b>Figure S8.</b> <sup>13</sup> C-NMR spectrum of compound <b>4c</b>  | <b>page 10</b> |
| <b>Figure S9.</b> <sup>13</sup> C-NMR spectrum of compound <b>4d</b>  | <b>page 11</b> |
| <b>Figure S10.</b> <sup>13</sup> C-NMR spectrum of compound <b>4e</b> | <b>page 12</b> |
| <b>Figure S11.</b> UV spectrum of compound <b>4a</b>                  | <b>page 13</b> |
| <b>Figure S12.</b> UV spectrum of compound <b>4b</b>                  | <b>page 14</b> |
| <b>Figure S13.</b> UV spectrum of compound <b>4c</b>                  | <b>page 15</b> |
| <b>Figure S14.</b> UV spectrum of compound <b>4d</b>                  | <b>page 16</b> |
| <b>Figure S15.</b> UV spectrum of compound <b>4e</b>                  | <b>page 17</b> |

|                                                                         |                |
|-------------------------------------------------------------------------|----------------|
| <b>Figure S16.</b> ESI-HRMS of compound <b>4a</b>                       | page <b>18</b> |
| <b>Figure S17.</b> Mass spectrum of <b>4a</b> in positive ion ESI-MS/MS | page <b>19</b> |
| <b>Figure S18.</b> Proposed fragmentation of protonated <b>4a</b>       | page <b>20</b> |
| <b>Figure S19.</b> ESI-HRMS of compound <b>4b</b>                       | page <b>21</b> |
| <b>Figure S20.</b> Mass spectrum of <b>4b</b> in positive ion ESI-MS/MS | page <b>22</b> |
| <b>Figure S21.</b> Proposed fragmentation of protonated <b>4b</b>       | page <b>23</b> |
| <b>Figure S22.</b> ESI-HRMS of compound <b>4c</b>                       | page <b>24</b> |
| <b>Figure S23.</b> Mass spectrum of <b>4c</b> in positive ion ESI-MS/MS | page <b>25</b> |
| <b>Figure S24.</b> Proposed fragmentation of protonated <b>4c</b>       | page <b>26</b> |
| <b>Figure S25.</b> ESI-HRMS of compound <b>4d</b>                       | page <b>27</b> |
| <b>Figure S26.</b> Mass spectrum of <b>4d</b> in positive ion ESI-MS/MS | page <b>28</b> |
| <b>Figure S27.</b> Proposed fragmentation of protonated <b>4d</b>       | page <b>29</b> |
| <b>Figure S28.</b> ESI-HRMS of compound <b>4e</b>                       | page <b>30</b> |
| <b>Figure S29.</b> Mass spectrum of <b>4e</b> in positive ion ESI-MS/MS | page <b>31</b> |
| <b>Figure S30.</b> Proposed fragmentation of protonated <b>4e</b>       | page <b>32</b> |

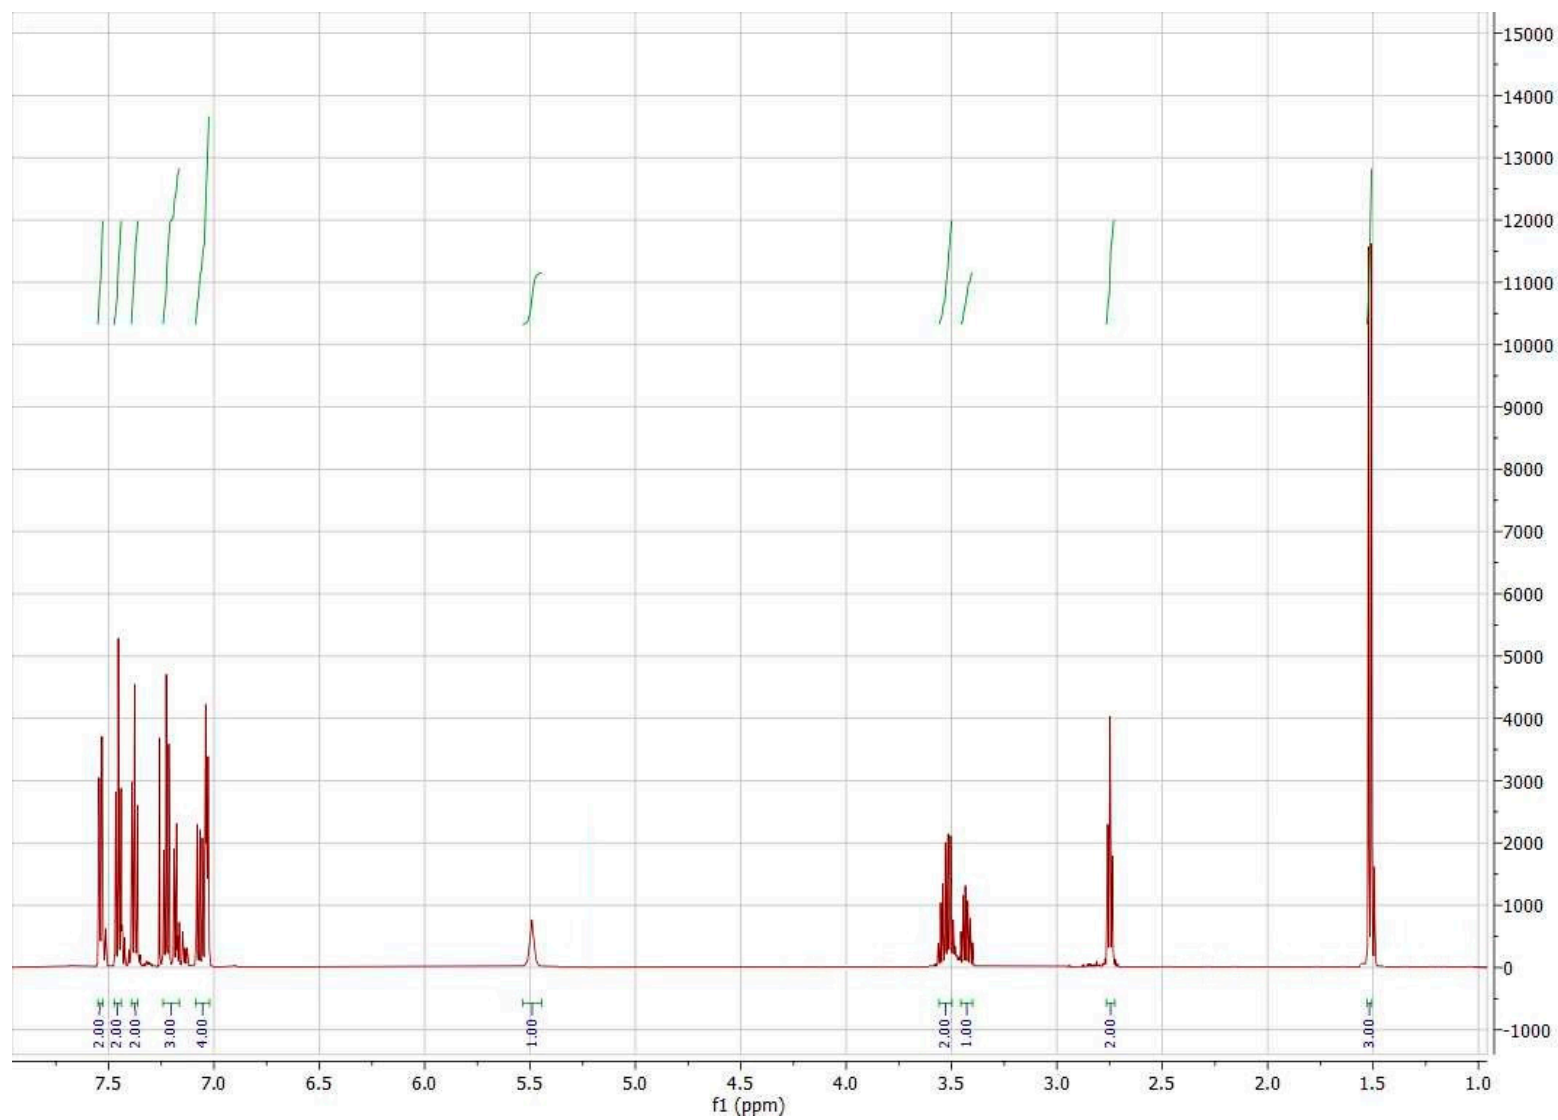

**Figure S1.**  $^1\text{H}$ -NMR spectrum of compound 4a.

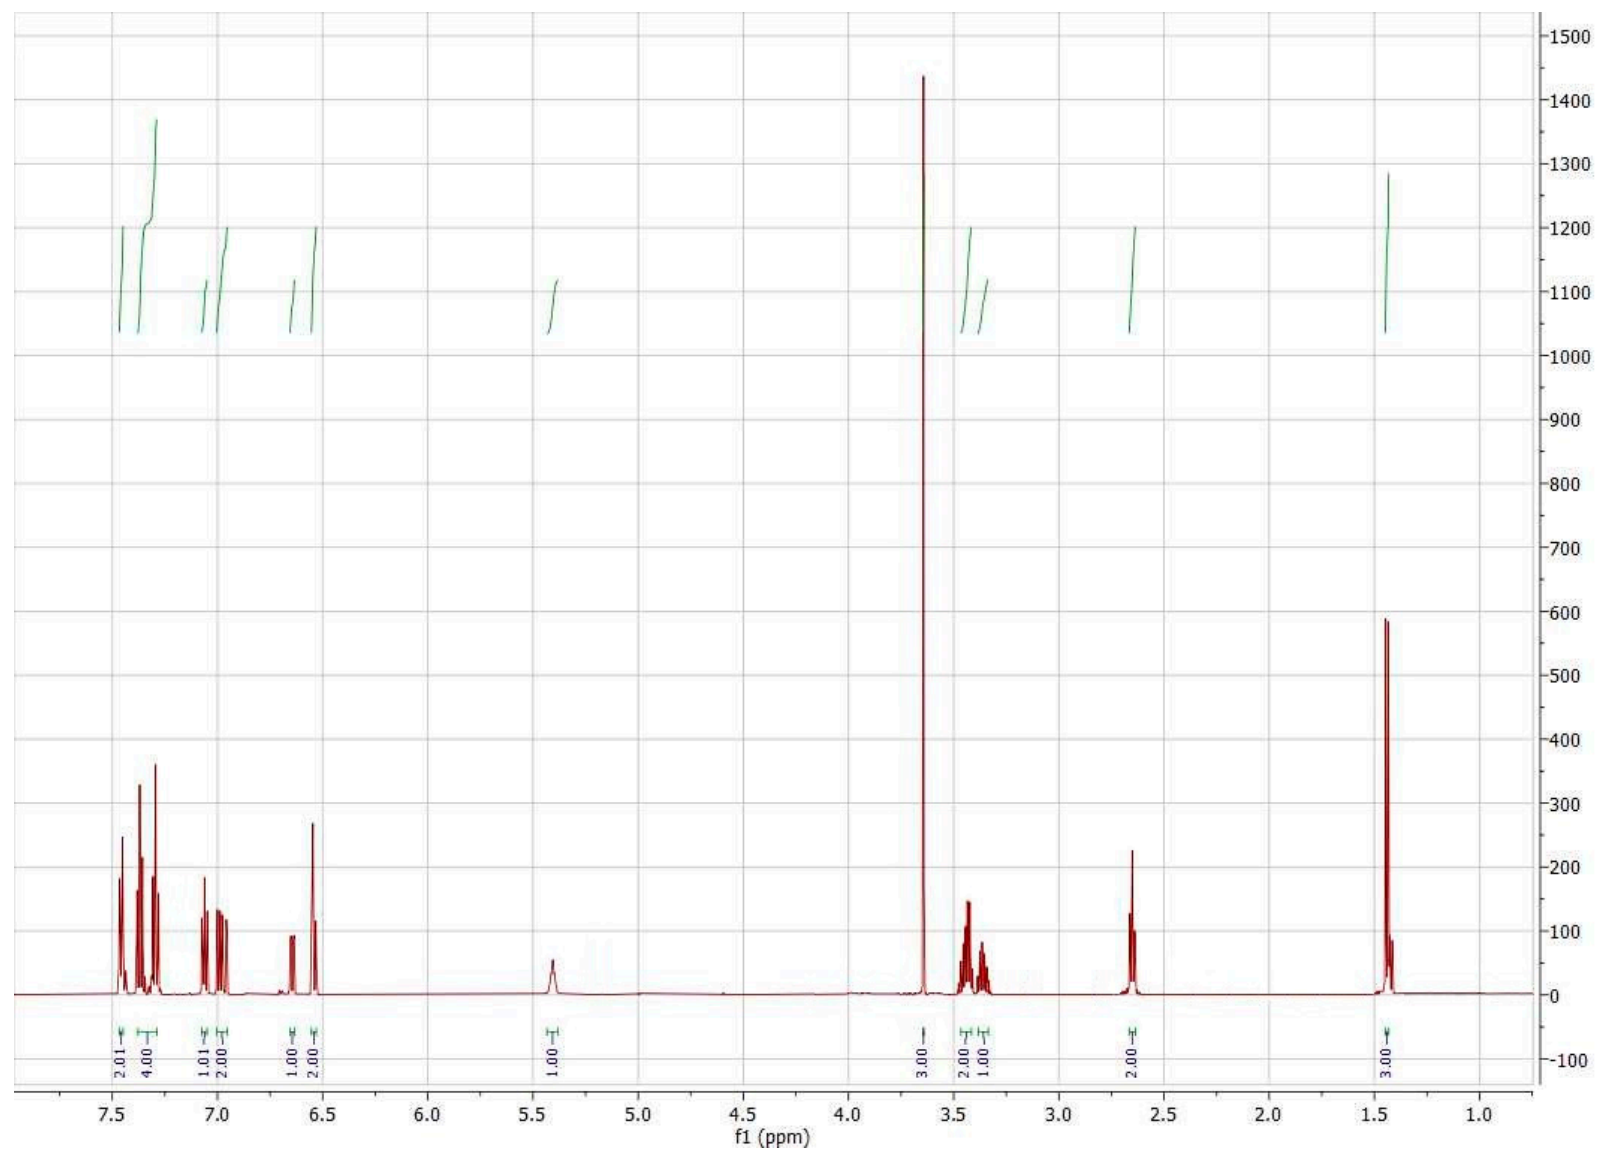

**Figure S2.**  $^1\text{H}$ -NMR spectrum of compound **4b**.

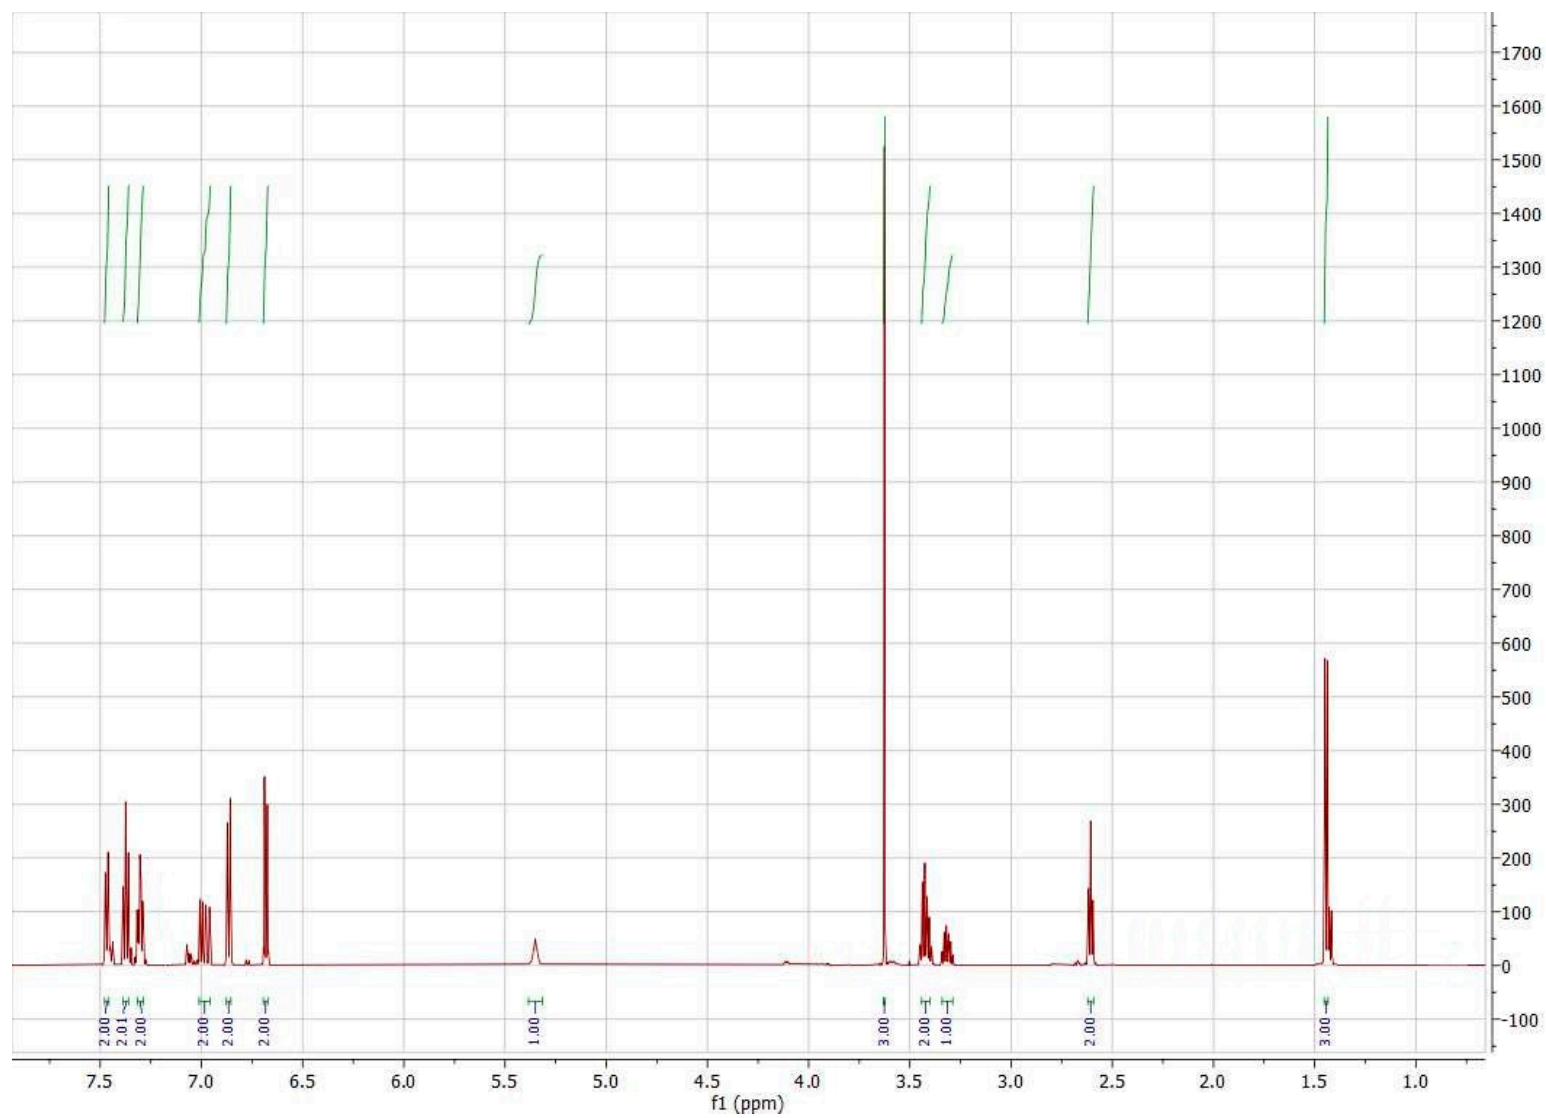

**Figure S3.**  $^1\text{H}$ -NMR spectrum of compound **4c**.

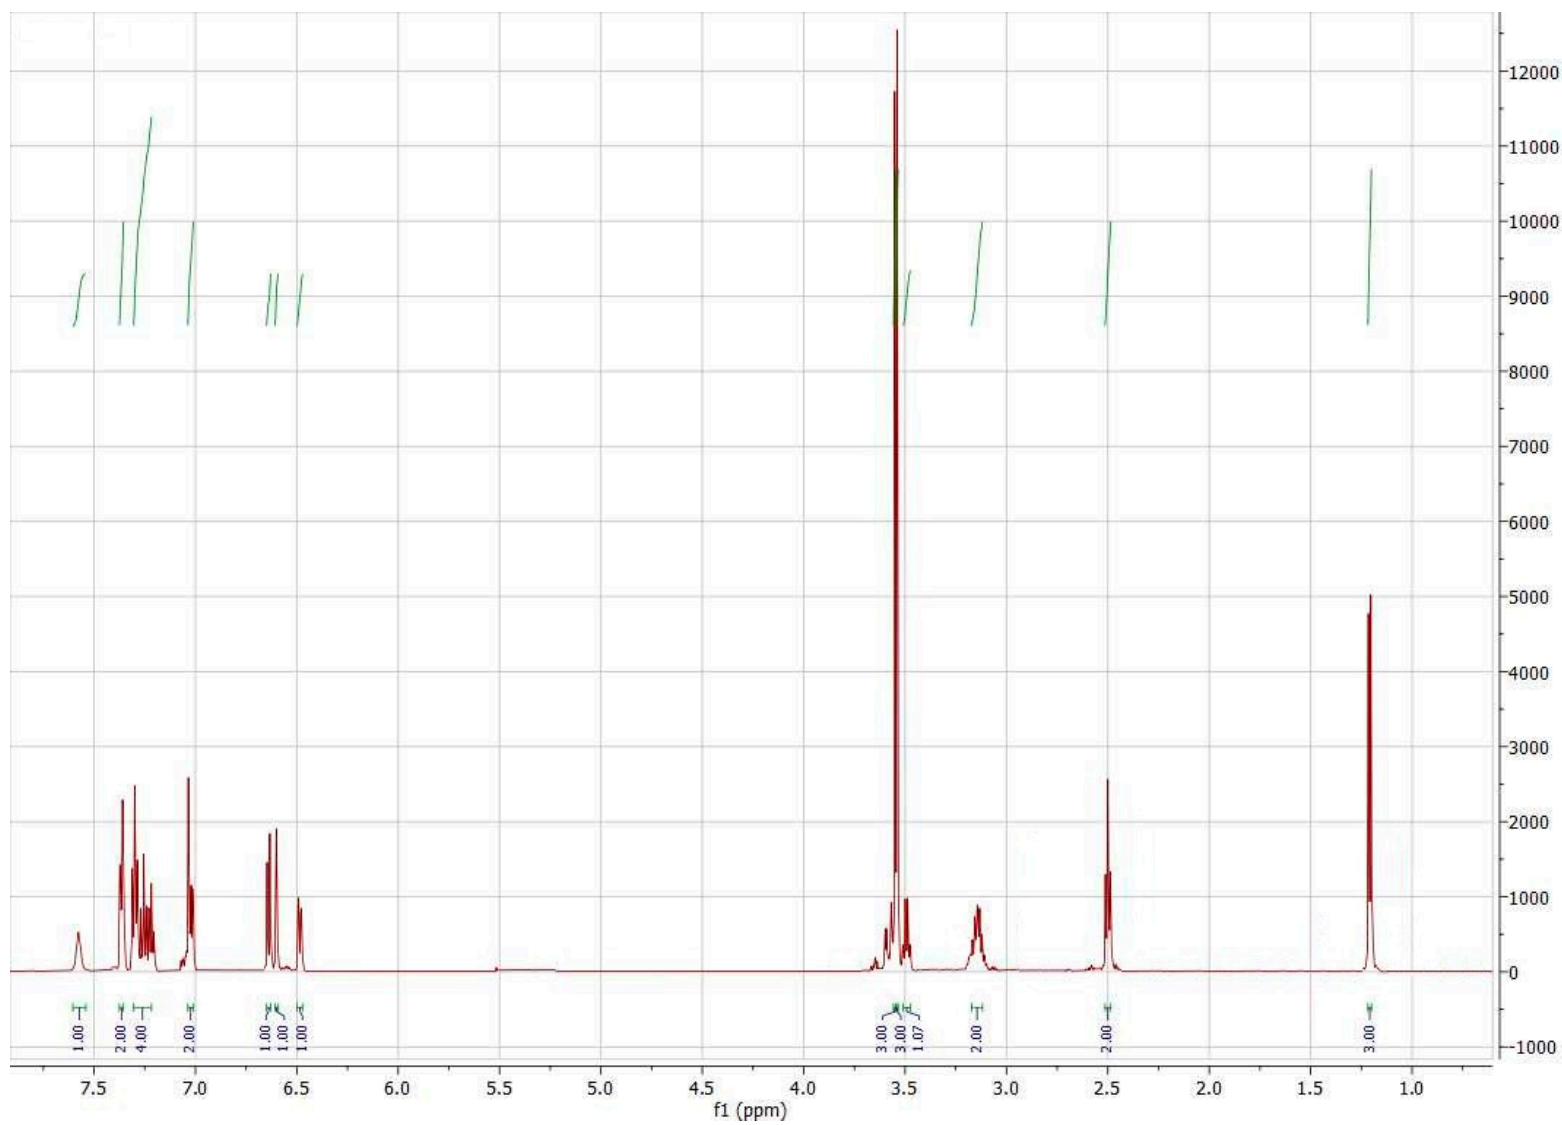

**Figure S4.**  $^1\text{H}$ -NMR spectrum of compound **4d**.

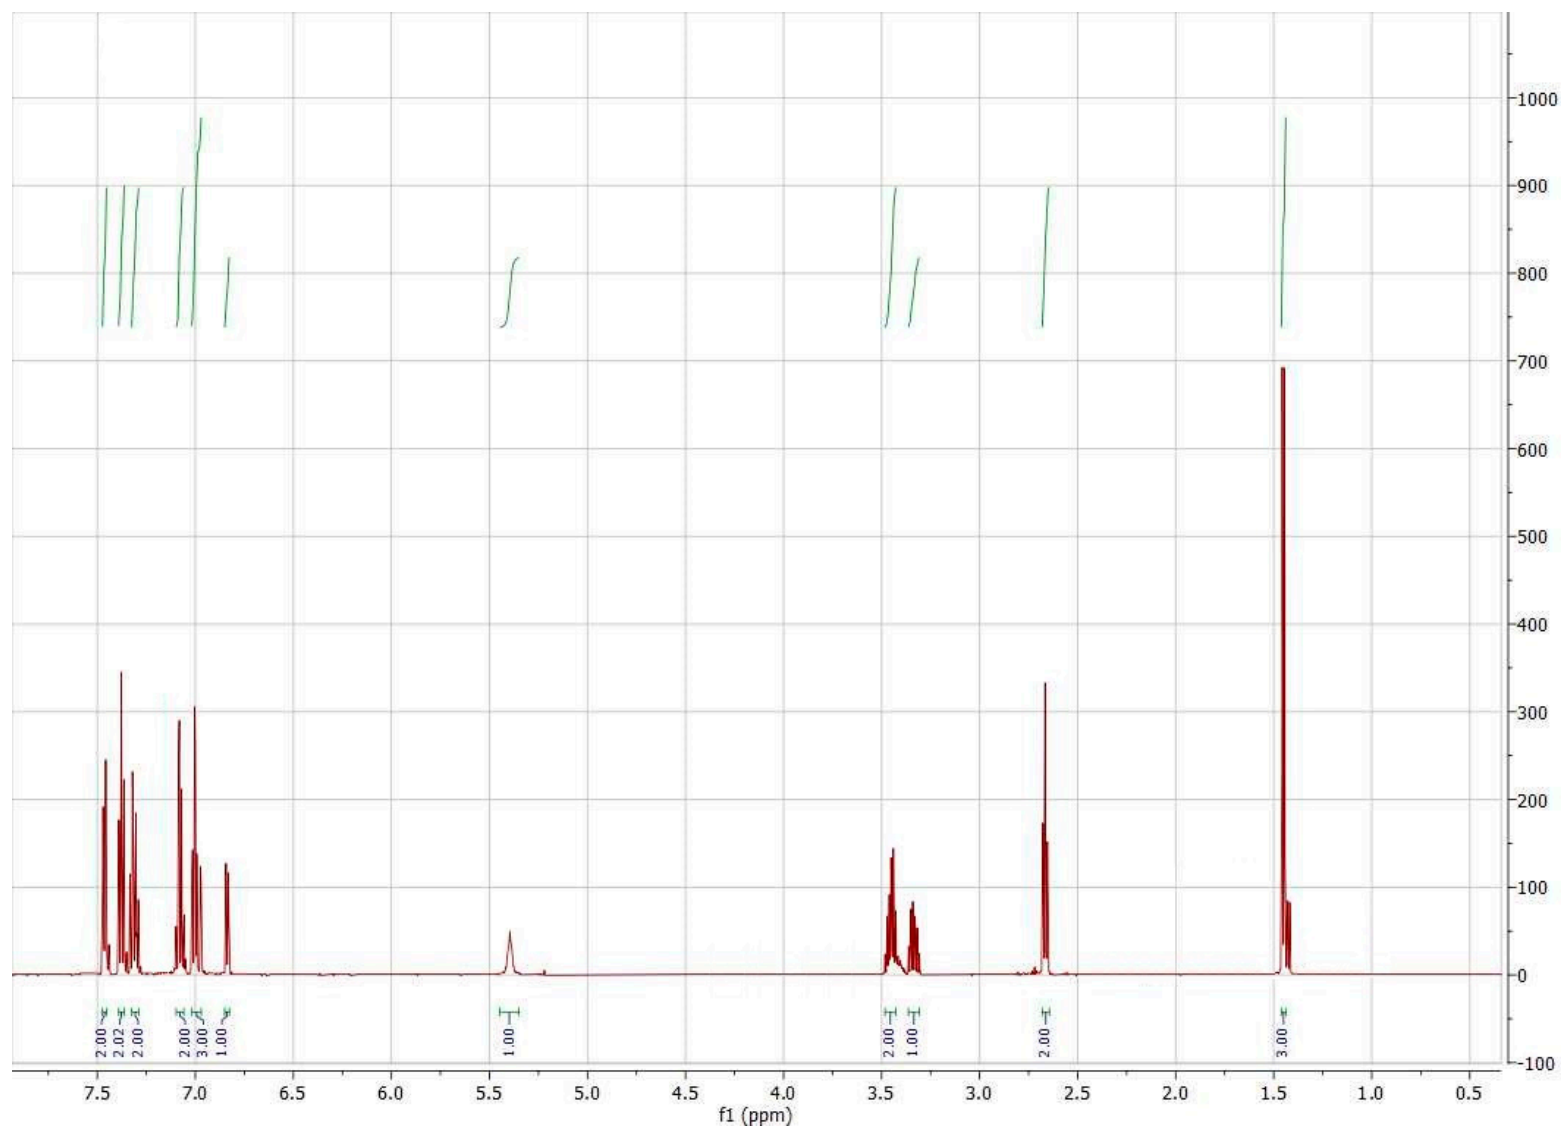

Figure S5.  $^1\text{H}$ -NMR spectrum of compound **4e**.

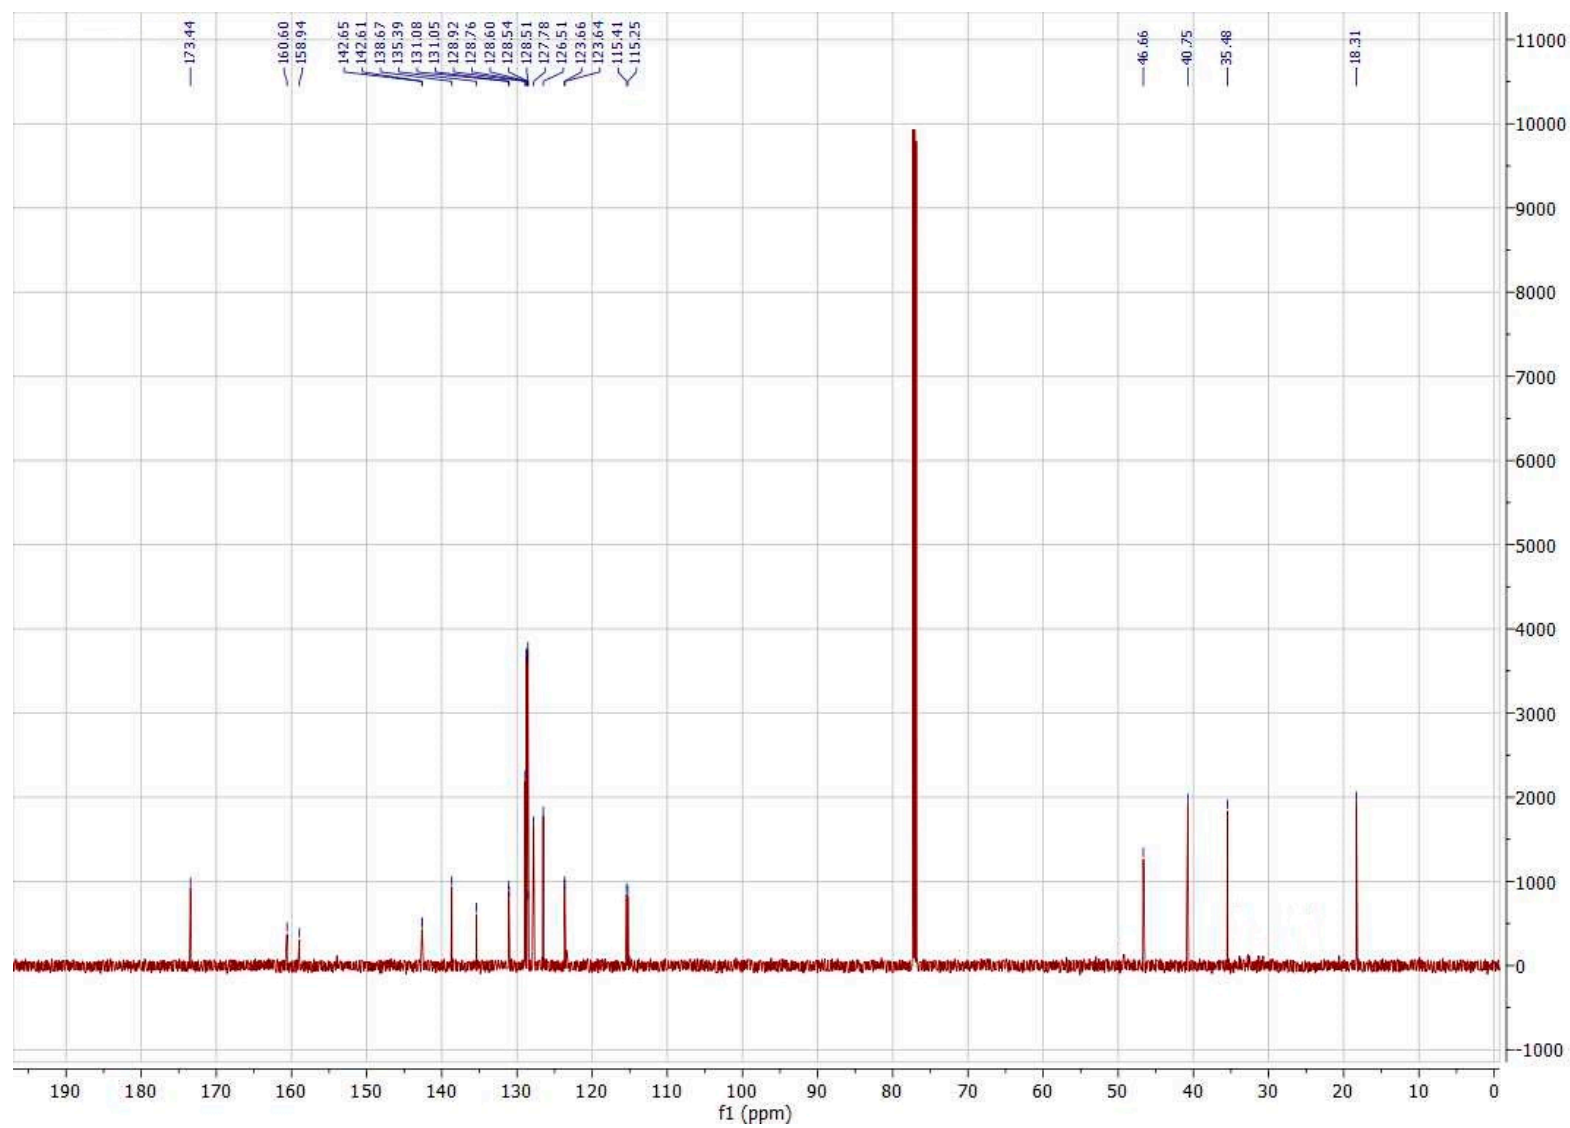

**Figure S6.**  $^{13}\text{C}$ -NMR spectrum of compound **4a**.



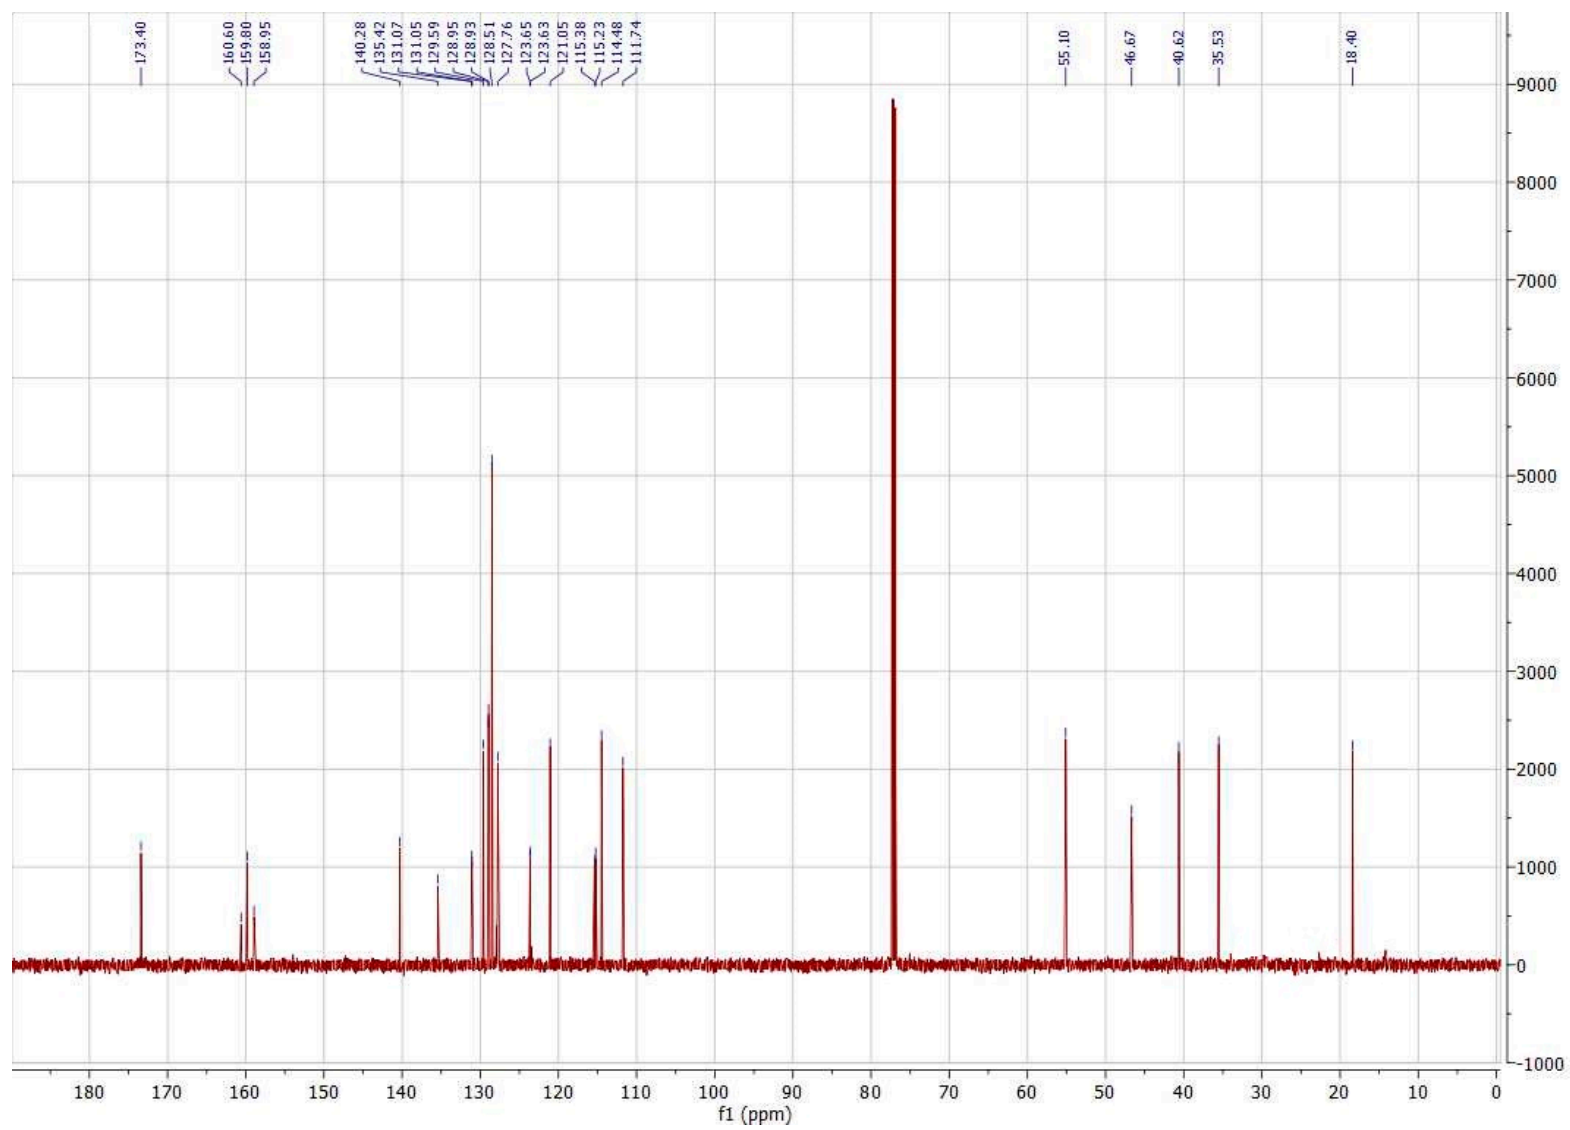

**Figure S7.** <sup>13</sup>C-NMR spectrum of compound **4b**.

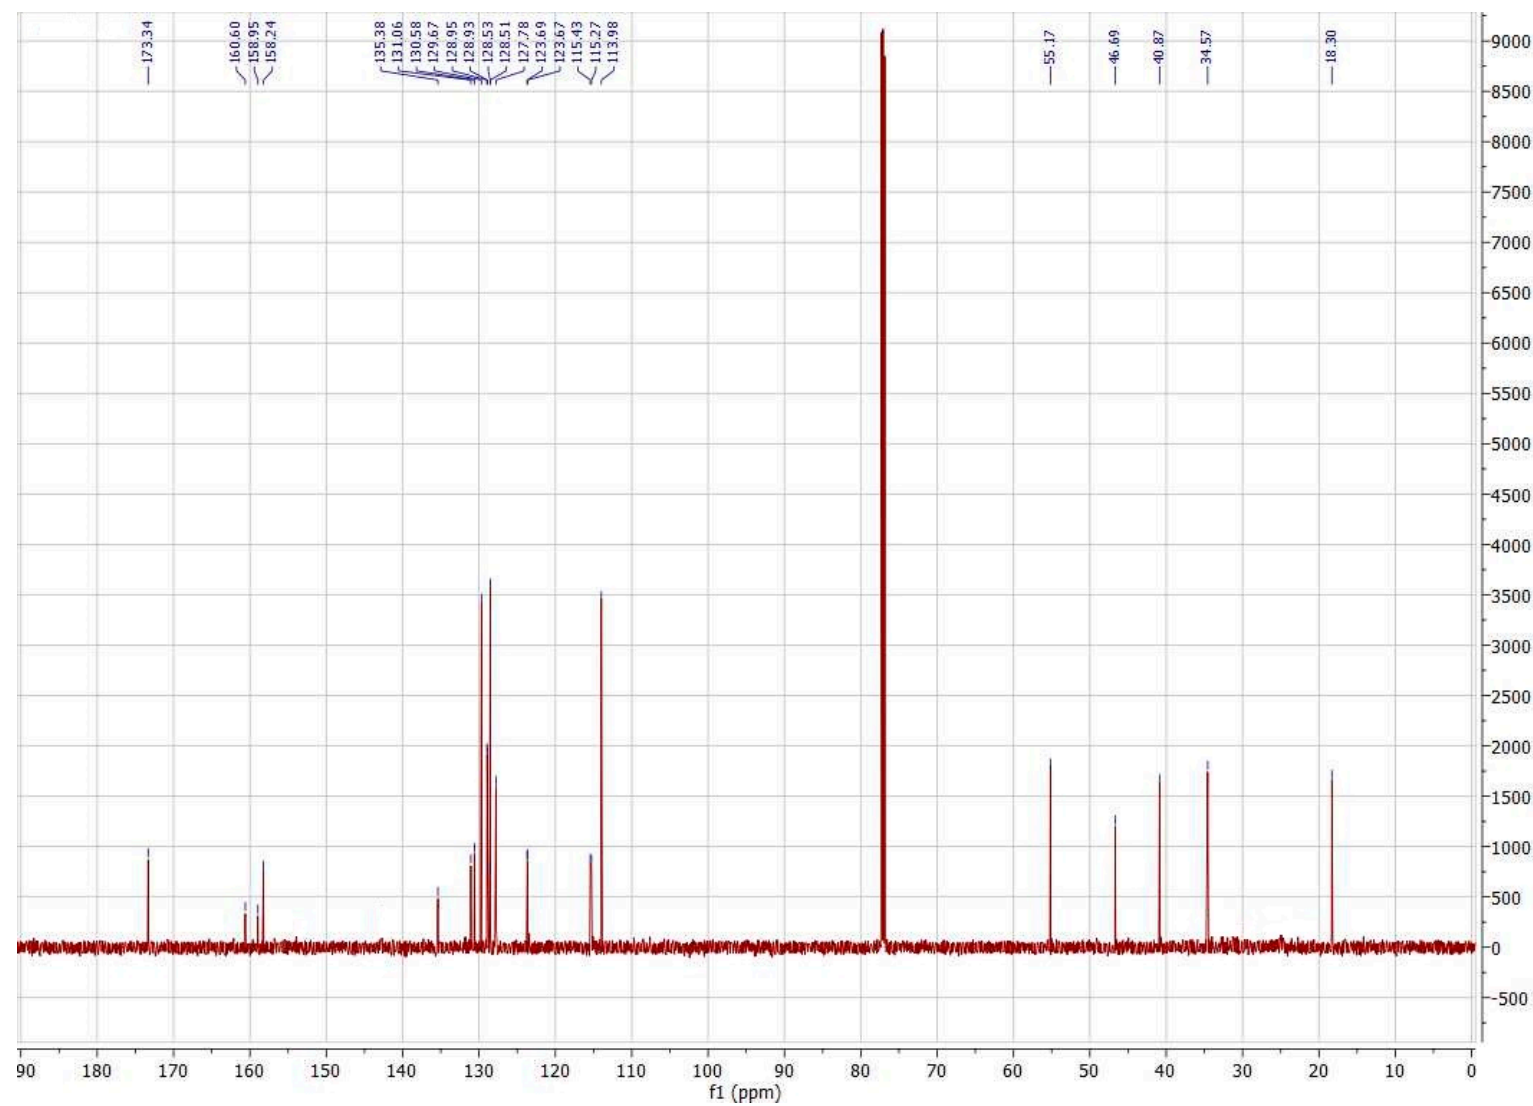

**Figure S8.** <sup>13</sup>C-NMR spectrum of compound **4c**.

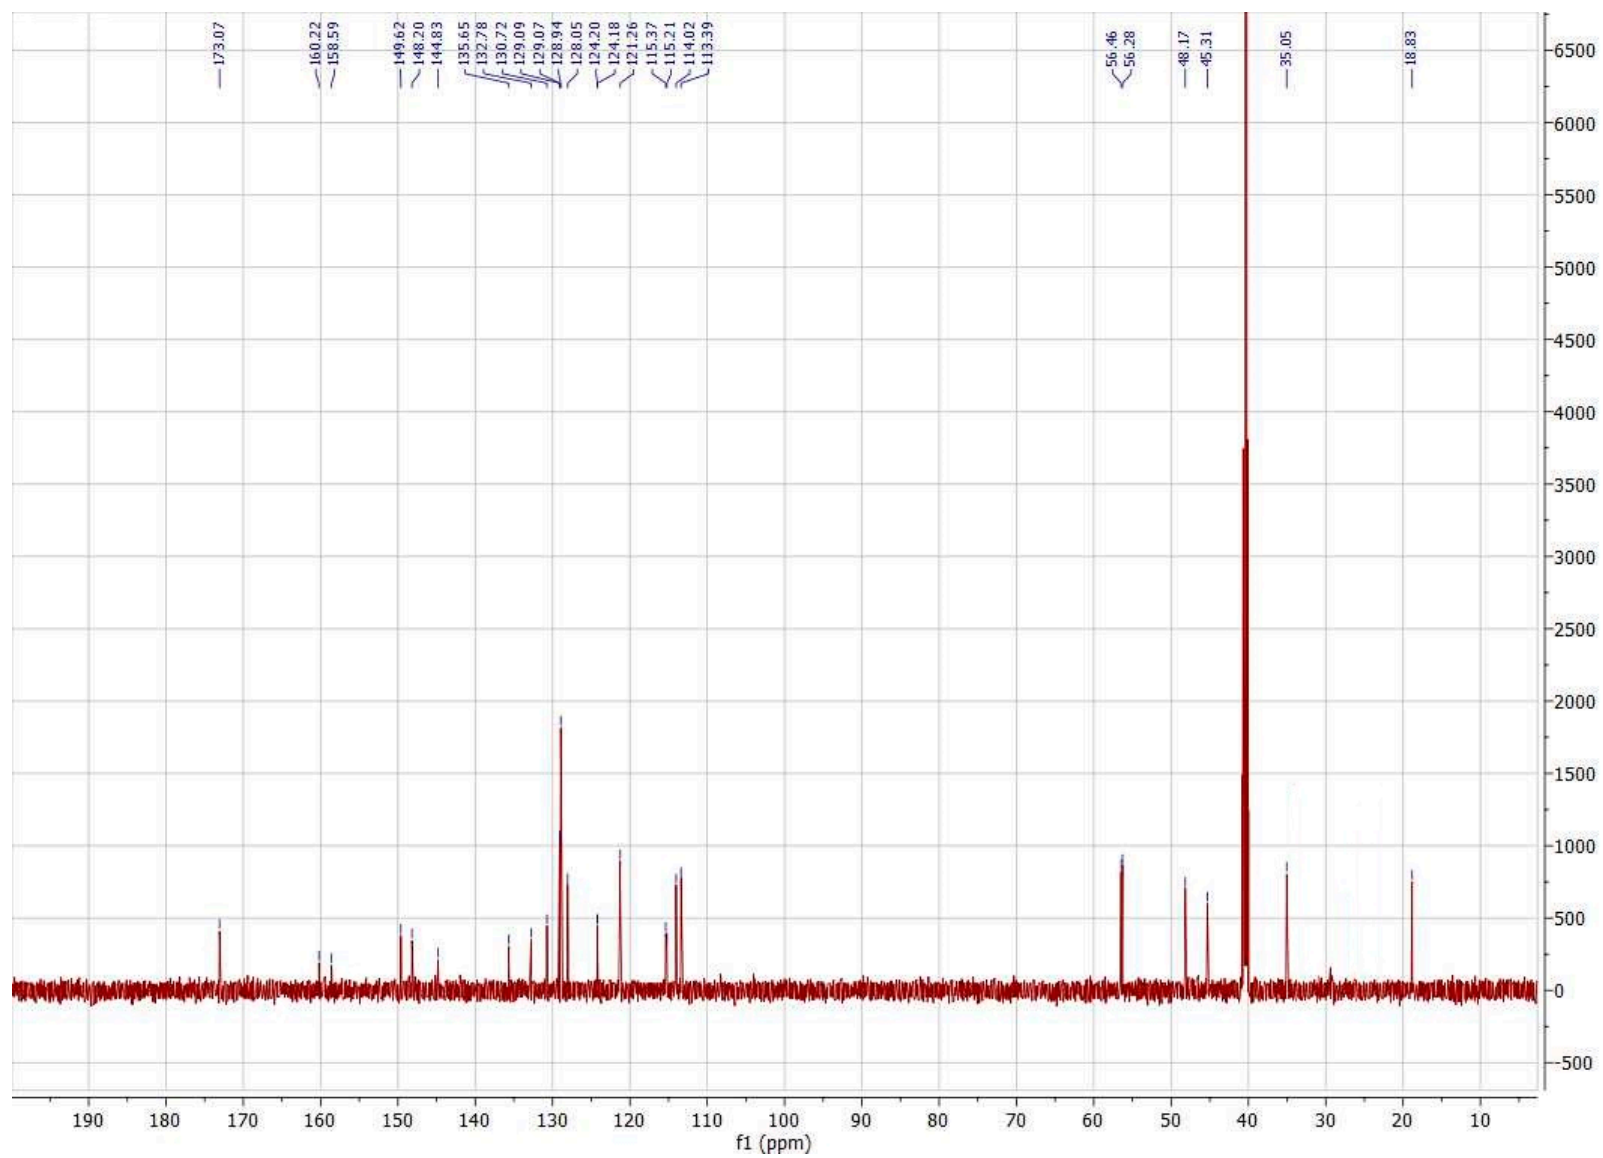

**Figure S9.** <sup>13</sup>C-NMR spectrum of compound 4d.

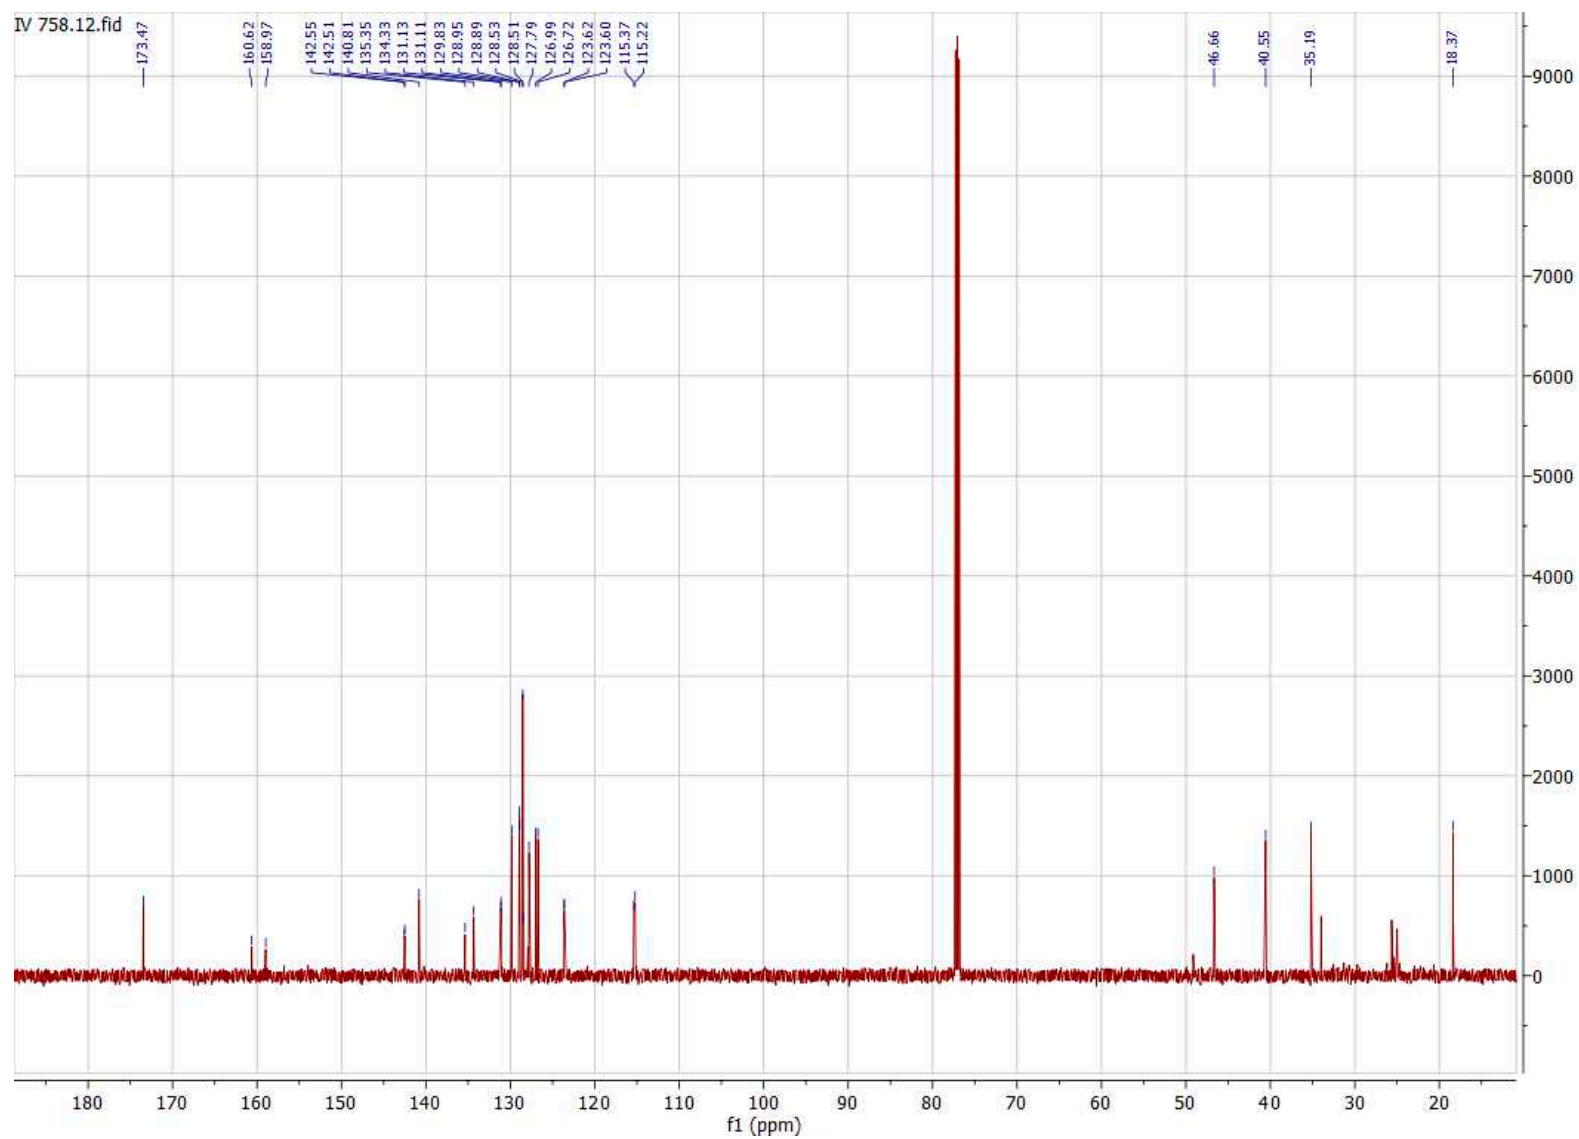

Figure S10.  $^{13}\text{C}$ -NMR spectrum of compound 4e.

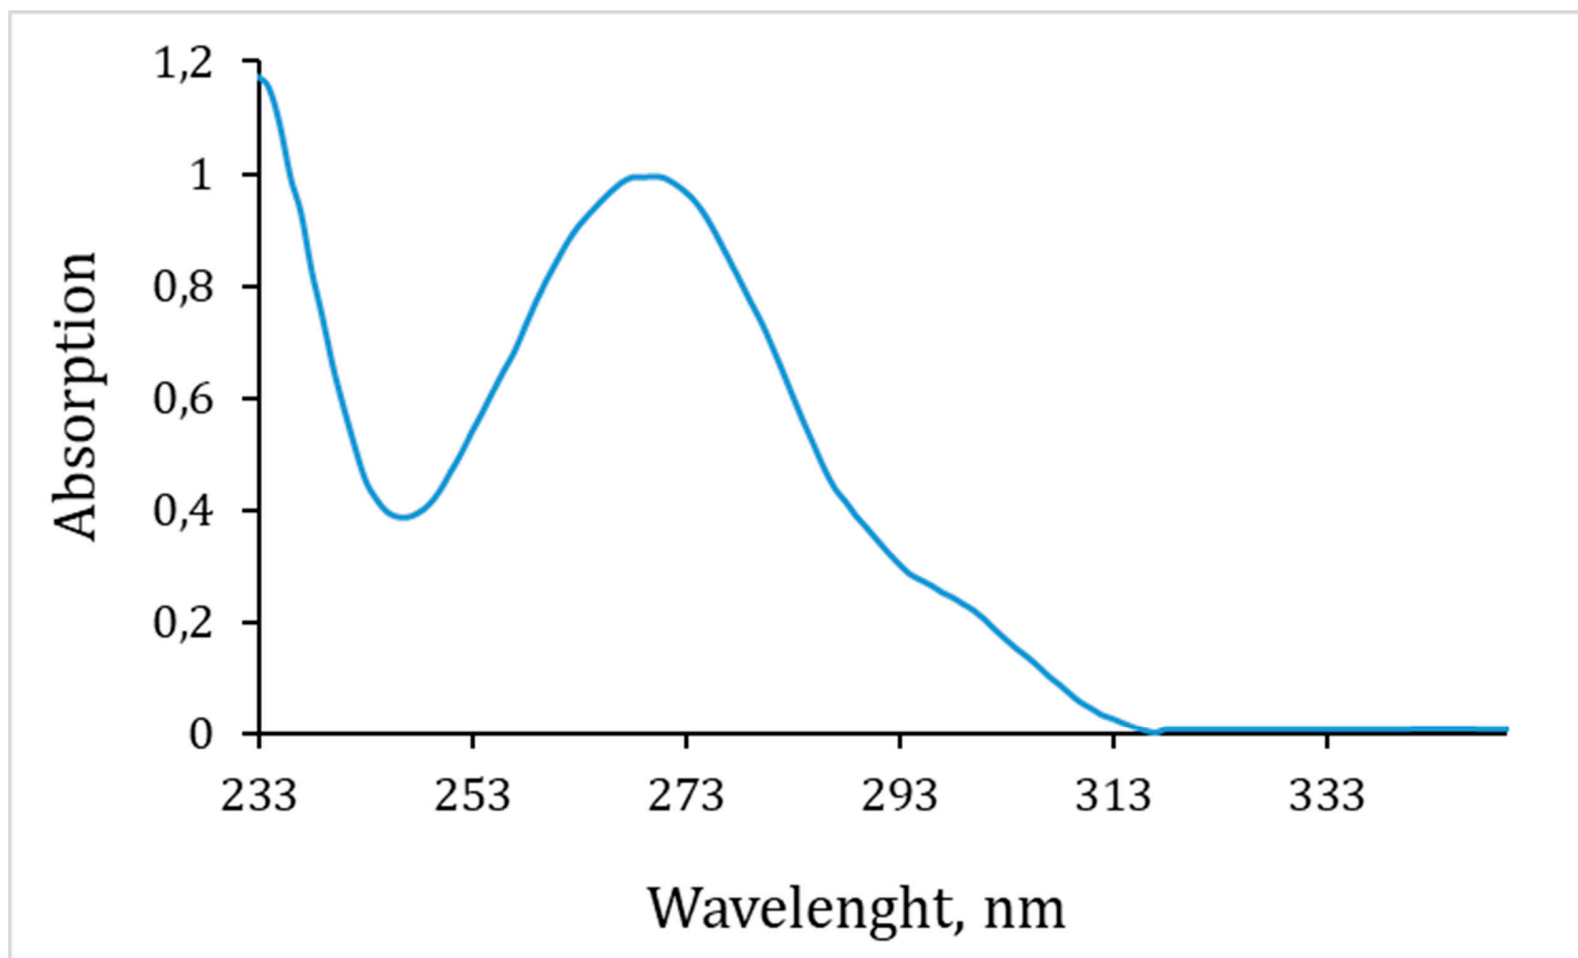

**Figure S11.** UV spectrum of compound **4a**.

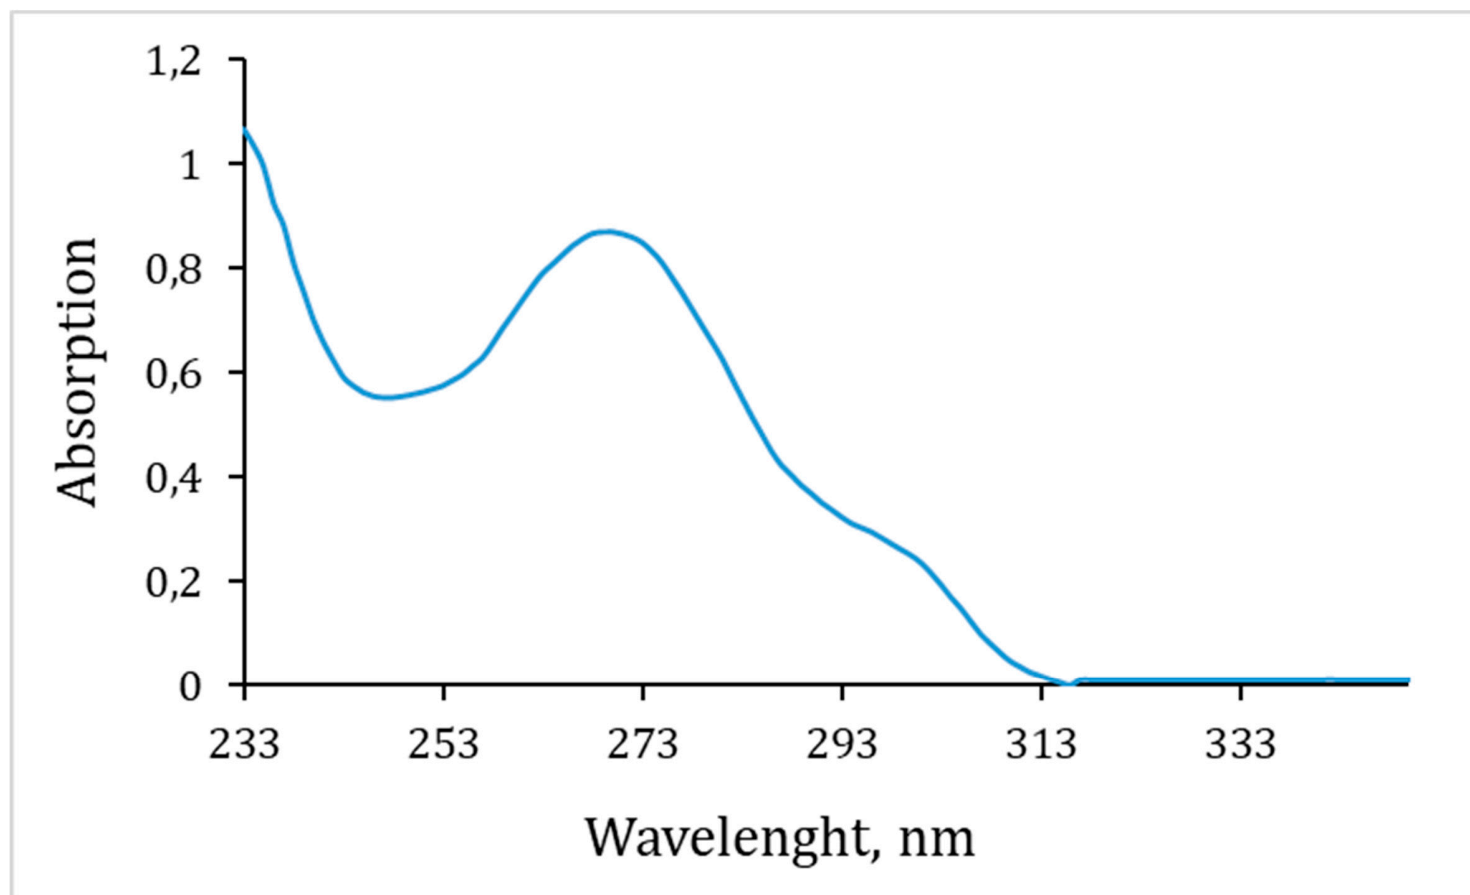

**Figure S12.** UV spectrum of compound **4b**.

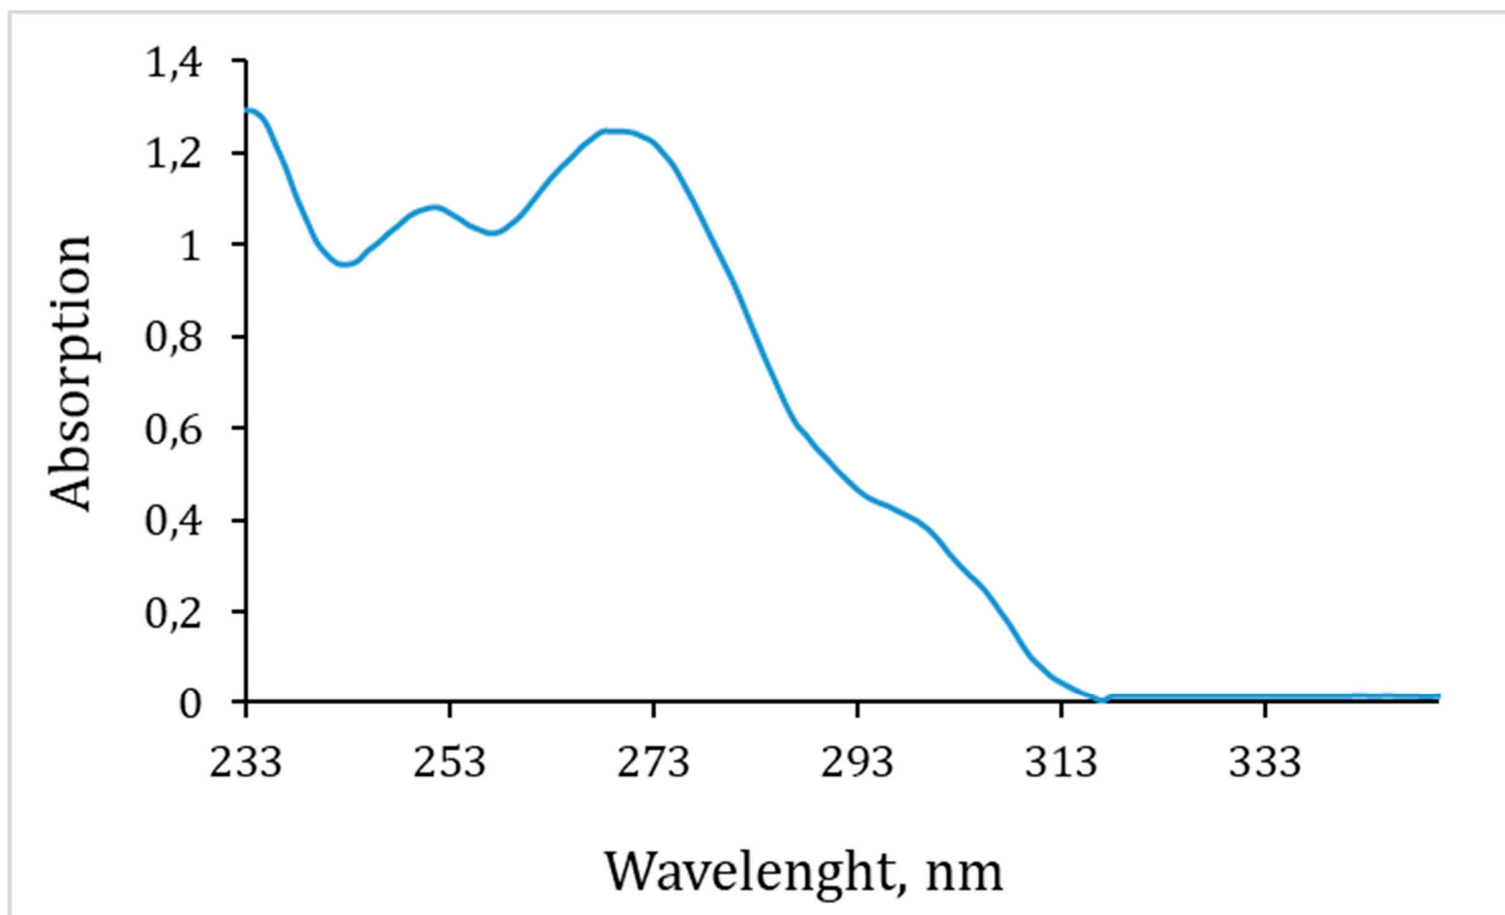

**Figure S13.** UV spectrum of compound **4c**.

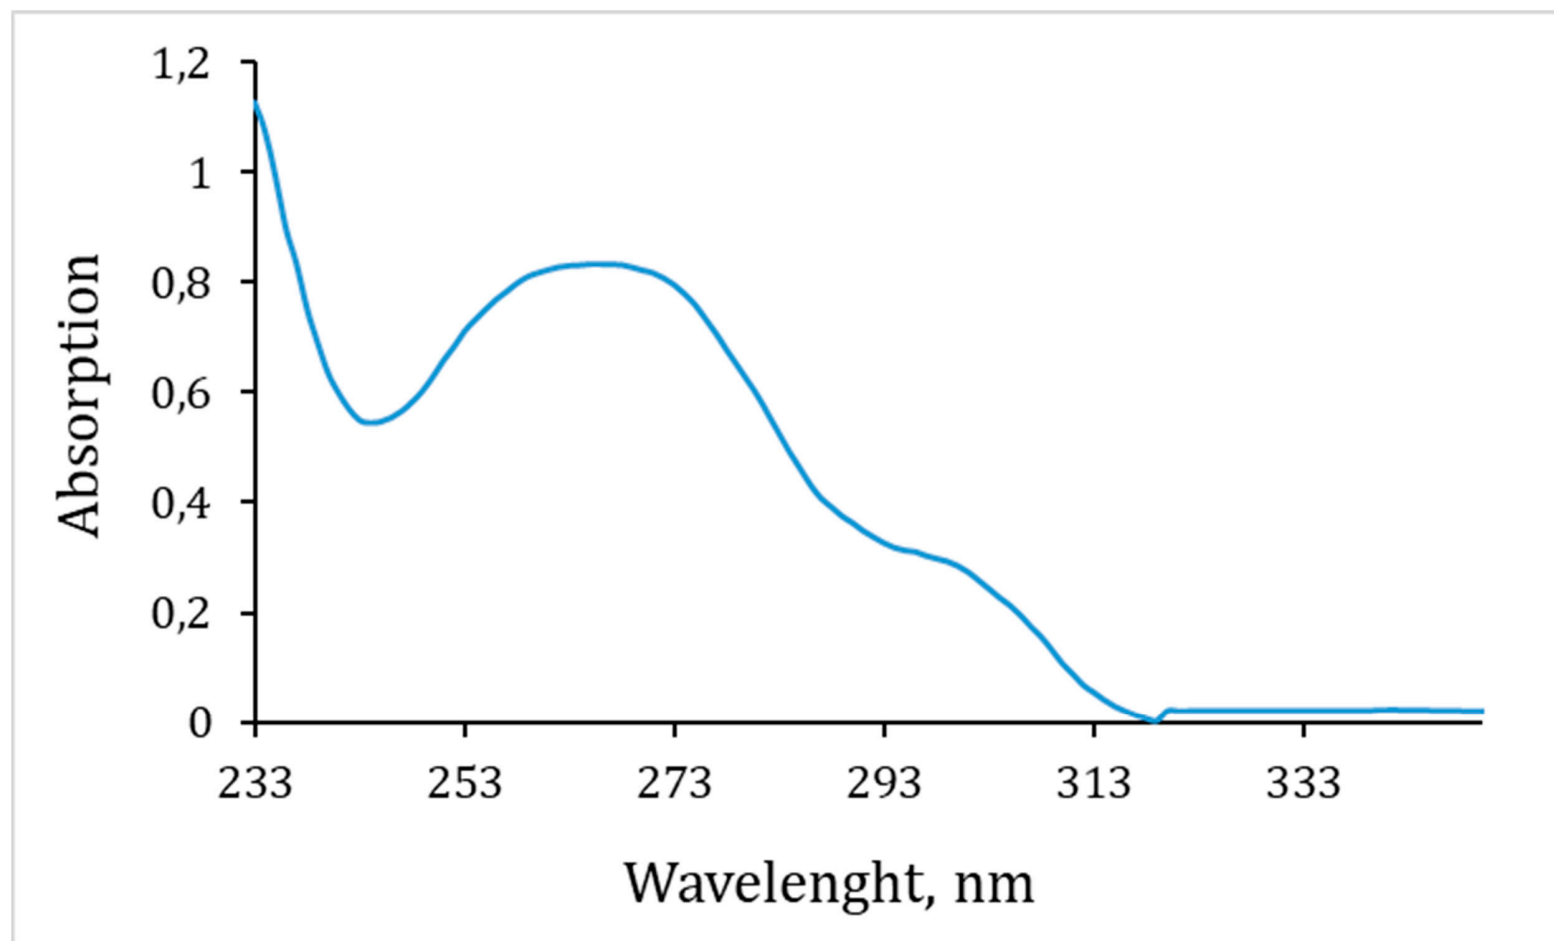

**Figure S14.** UV spectrum of compound **4d**.



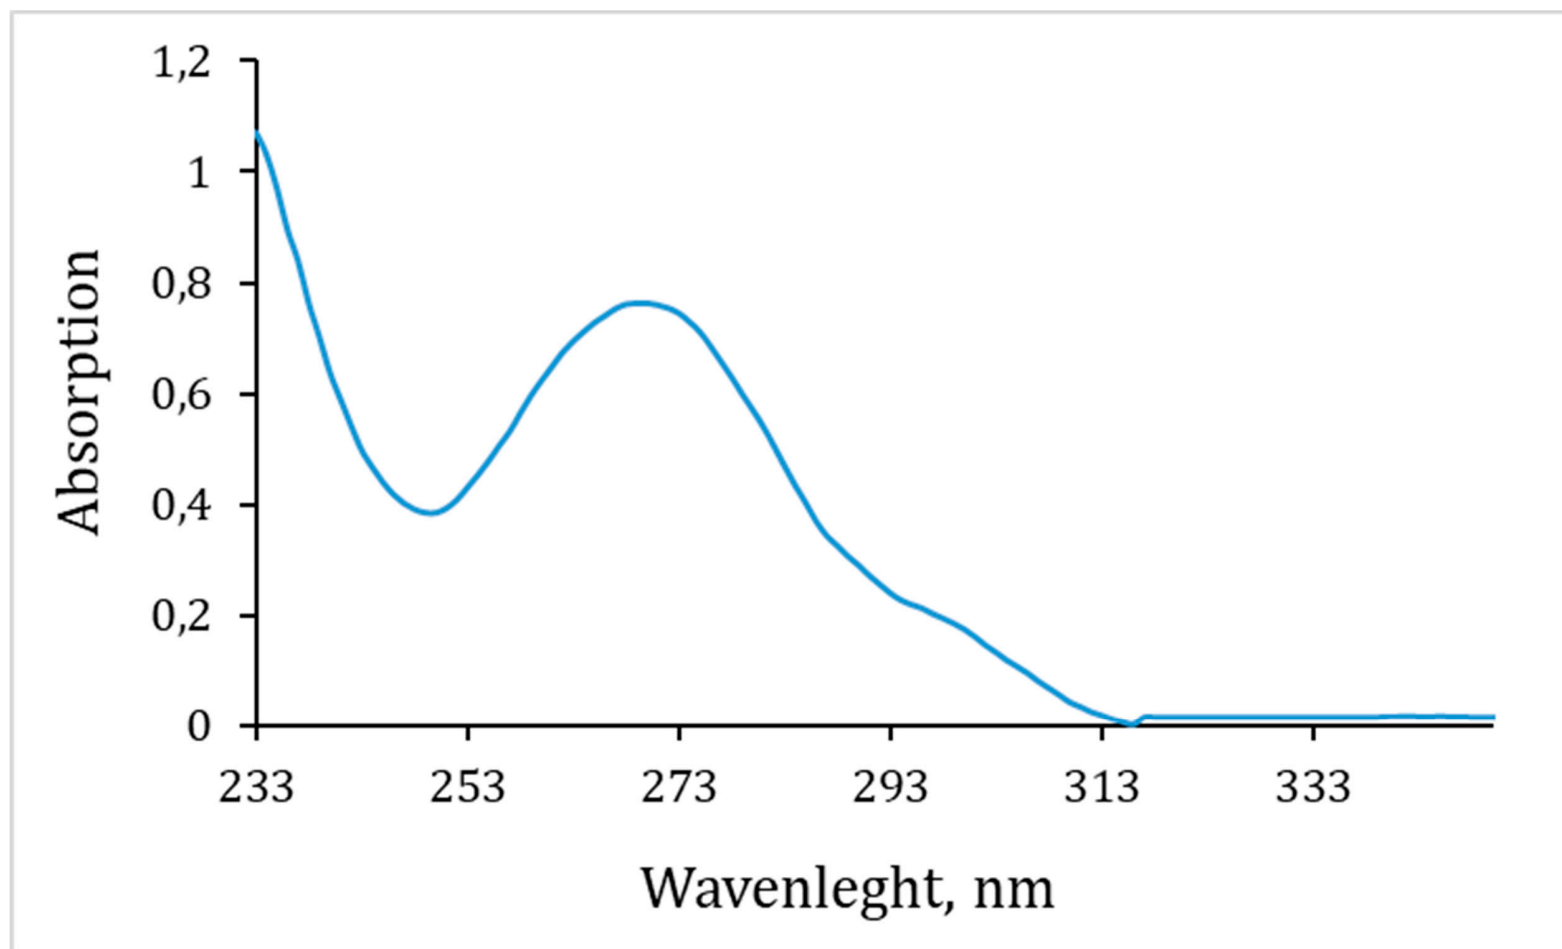

**Figure S15.** UV spectrum of compound **4e**.

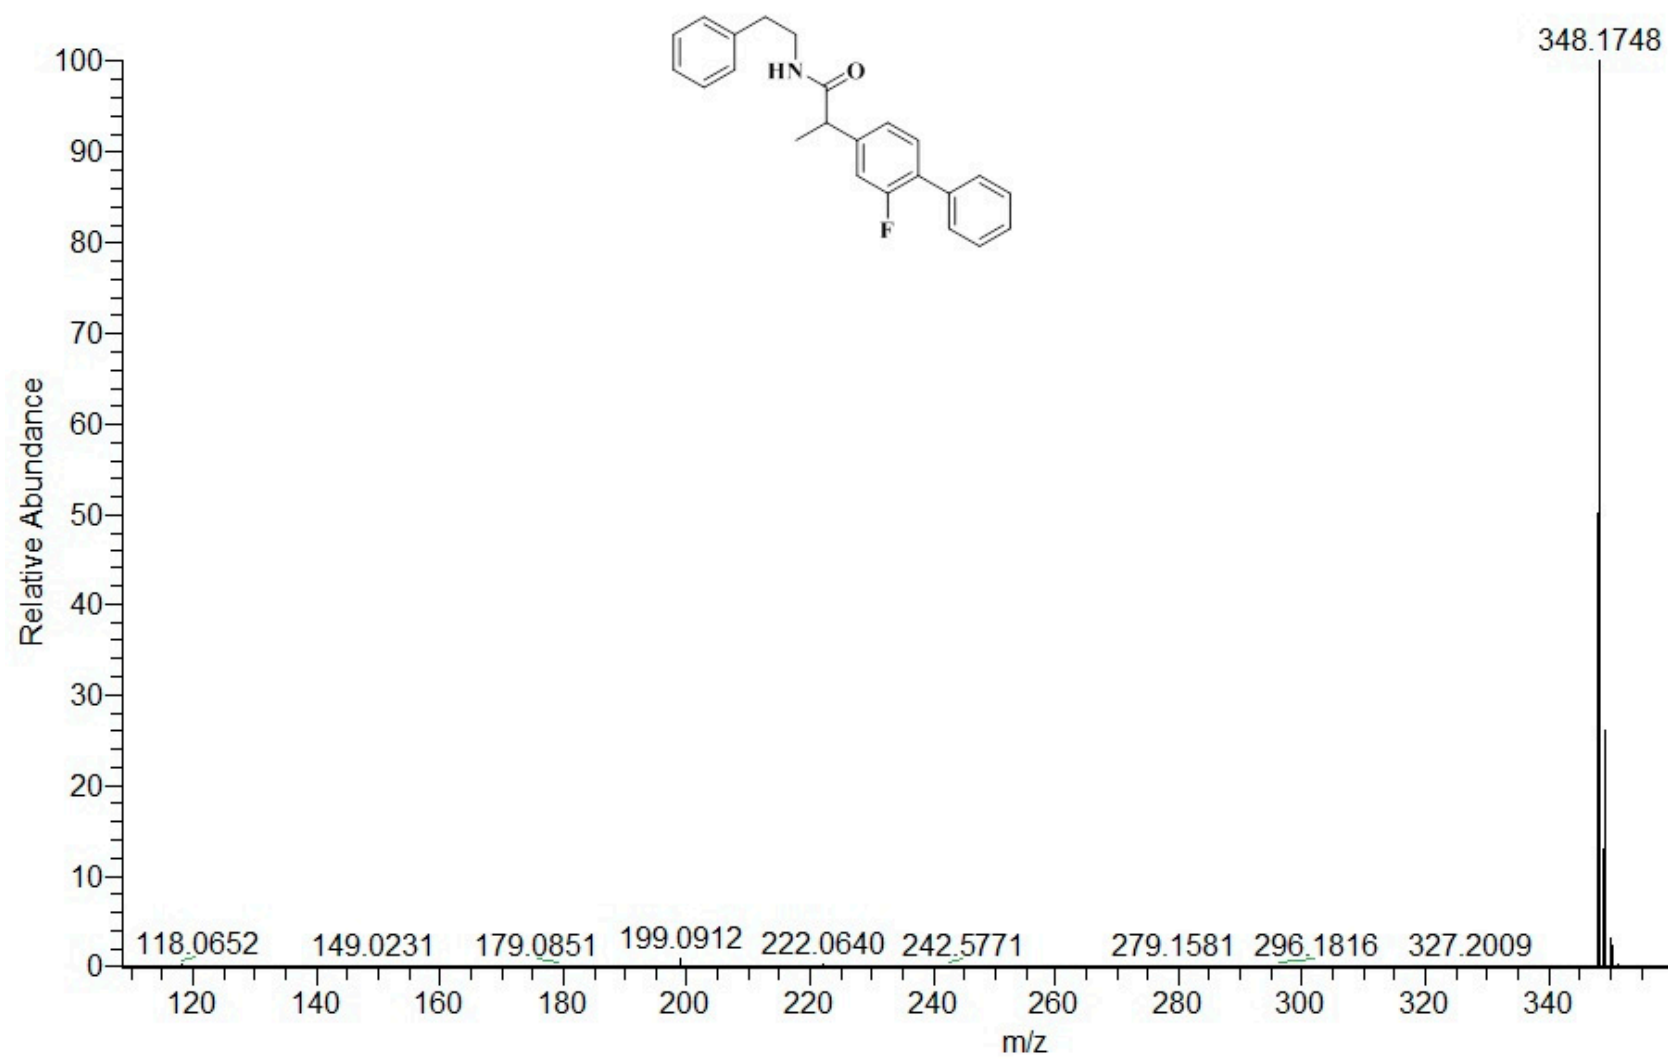

**Figure S16.** ESI-HRMS of compound 4a.

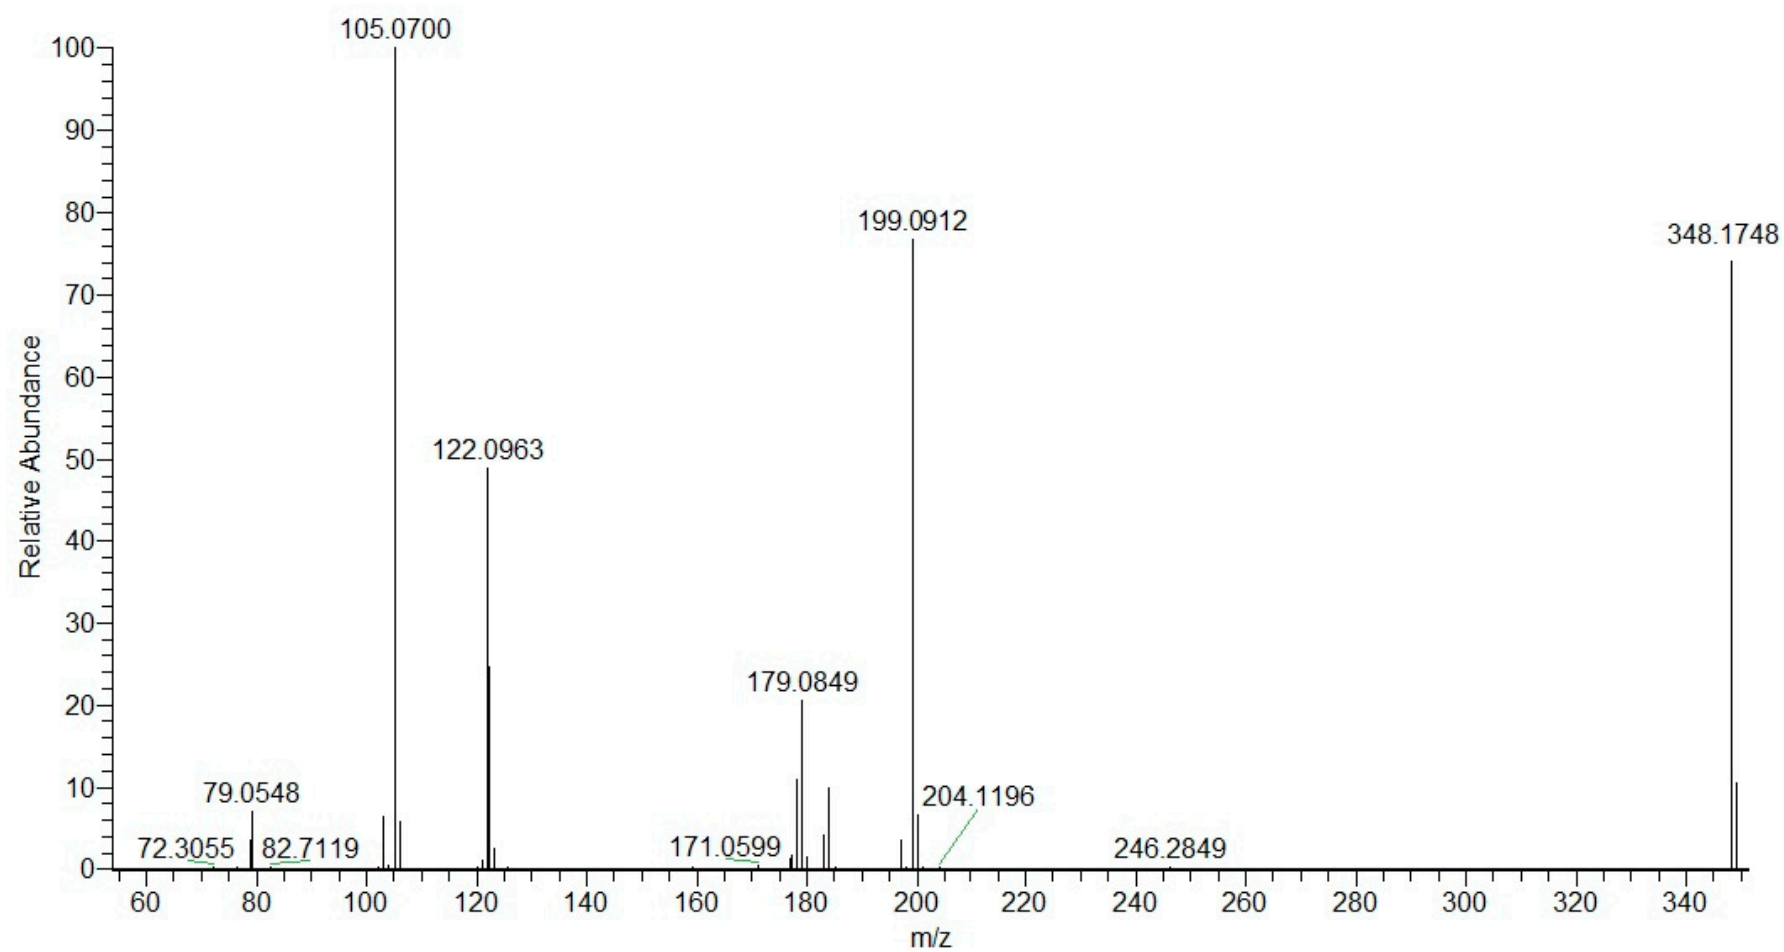

**Figure S17.** Mass spectrum of **4a** obtained by positive ion ESI-MS/MS.

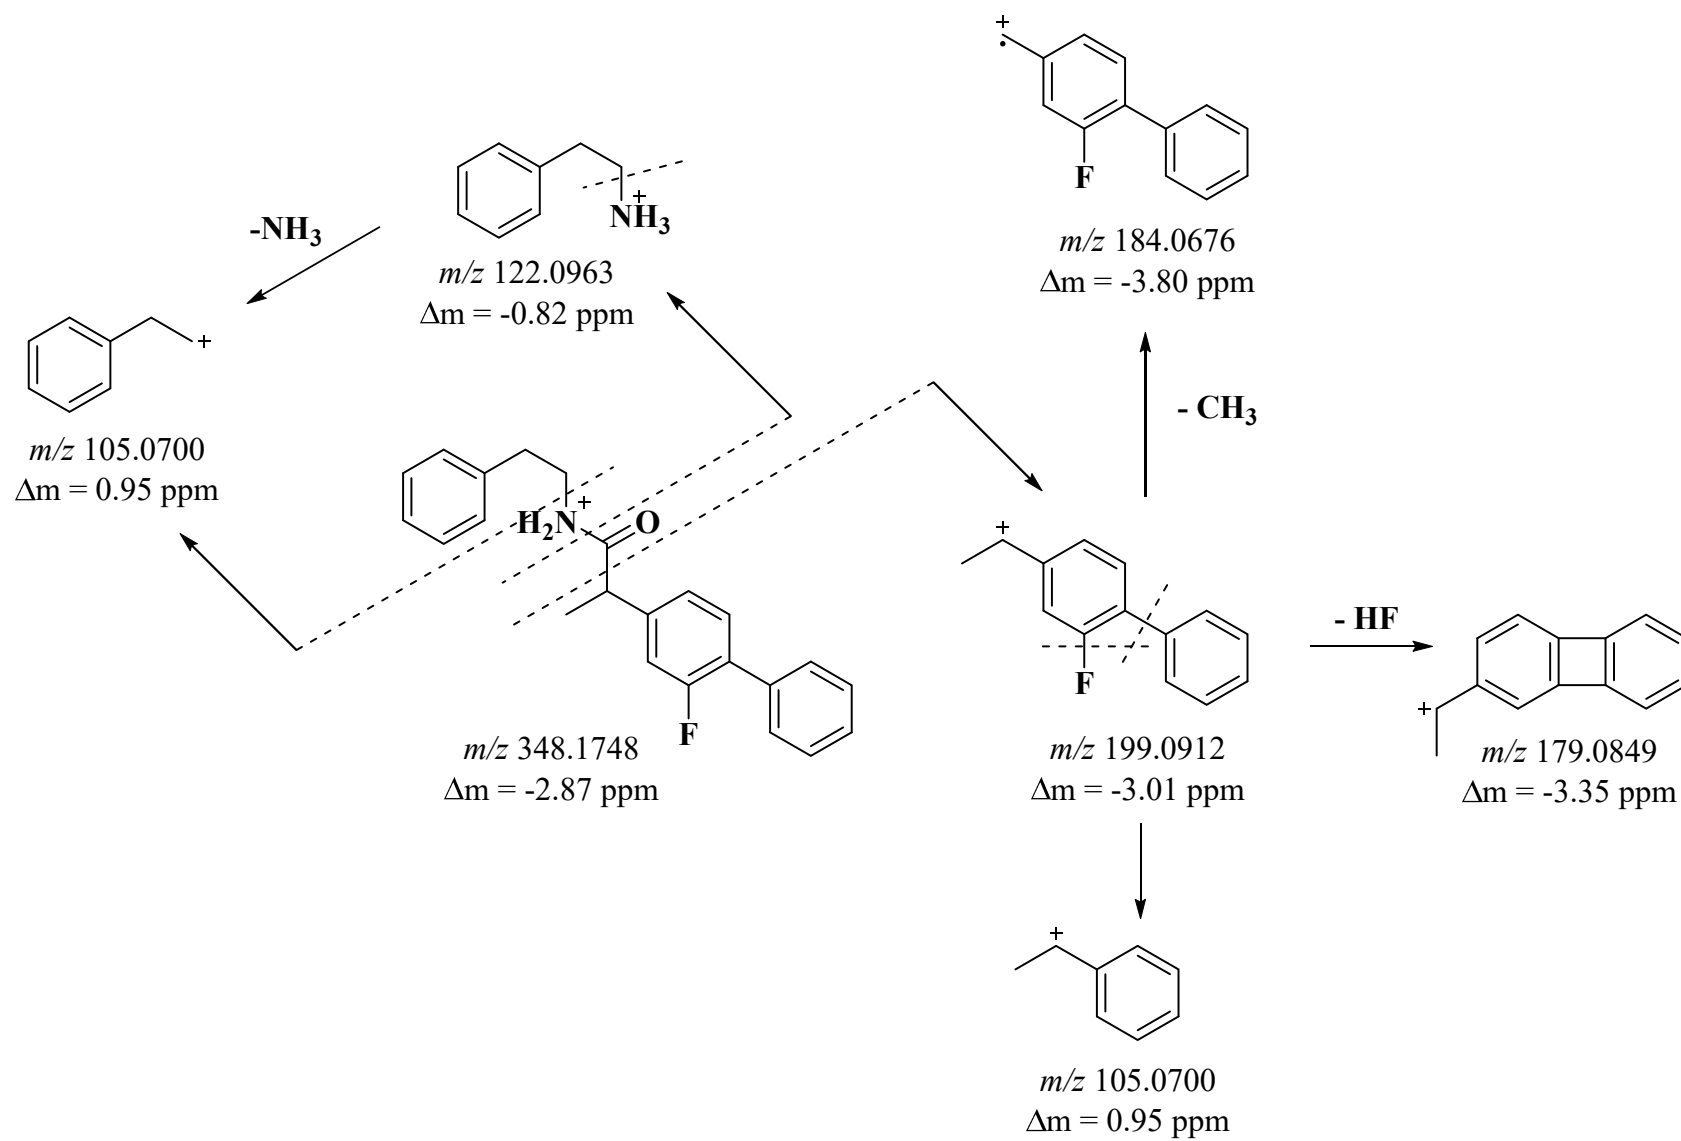

**Figure S18.** Proposed fragmentation of protonated **4a**.

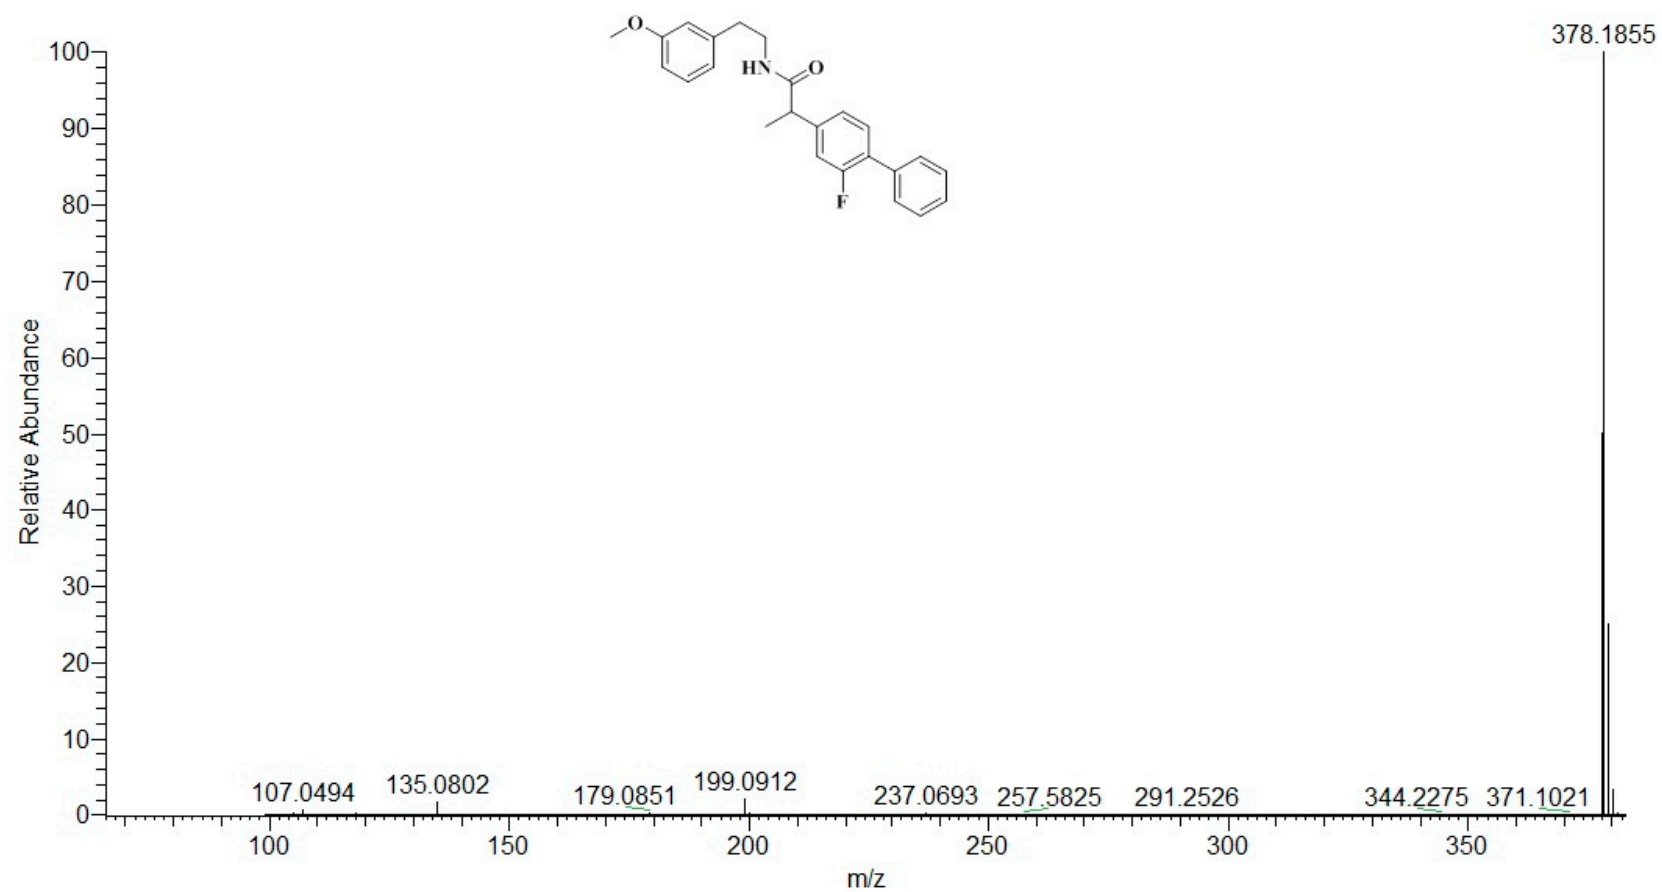

**Figure S19.** ESI-HRMS of compound **4b**.

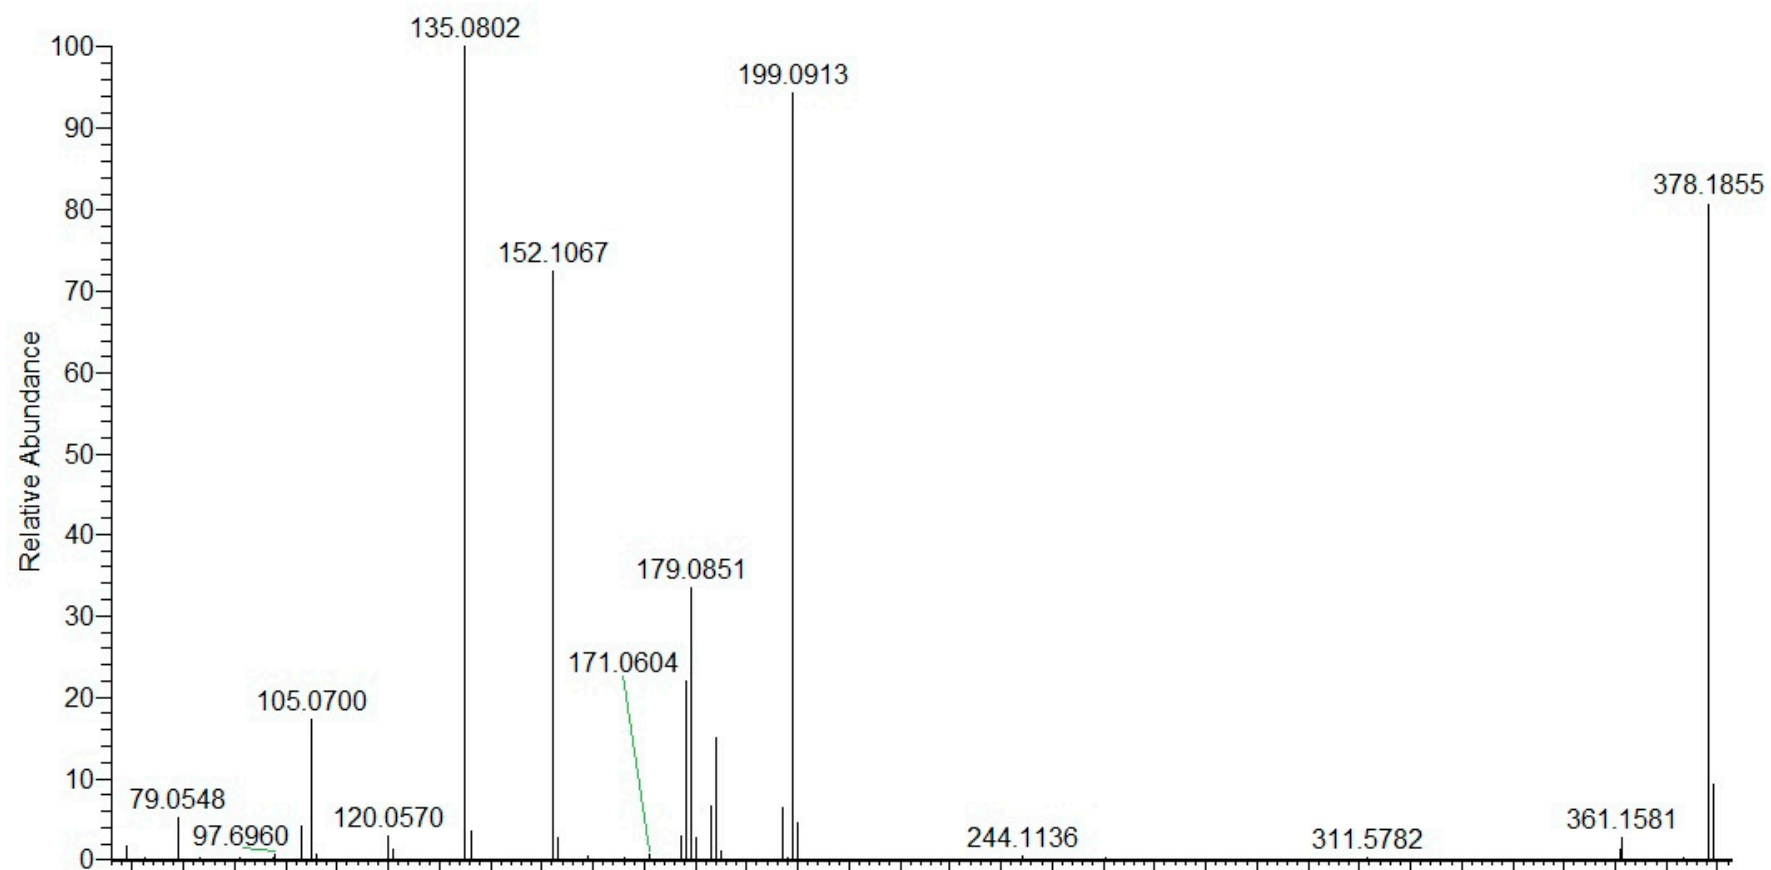

**Figure S20.** Mass spectrum of **4b** obtained by positive ion ESI-MS/MS.

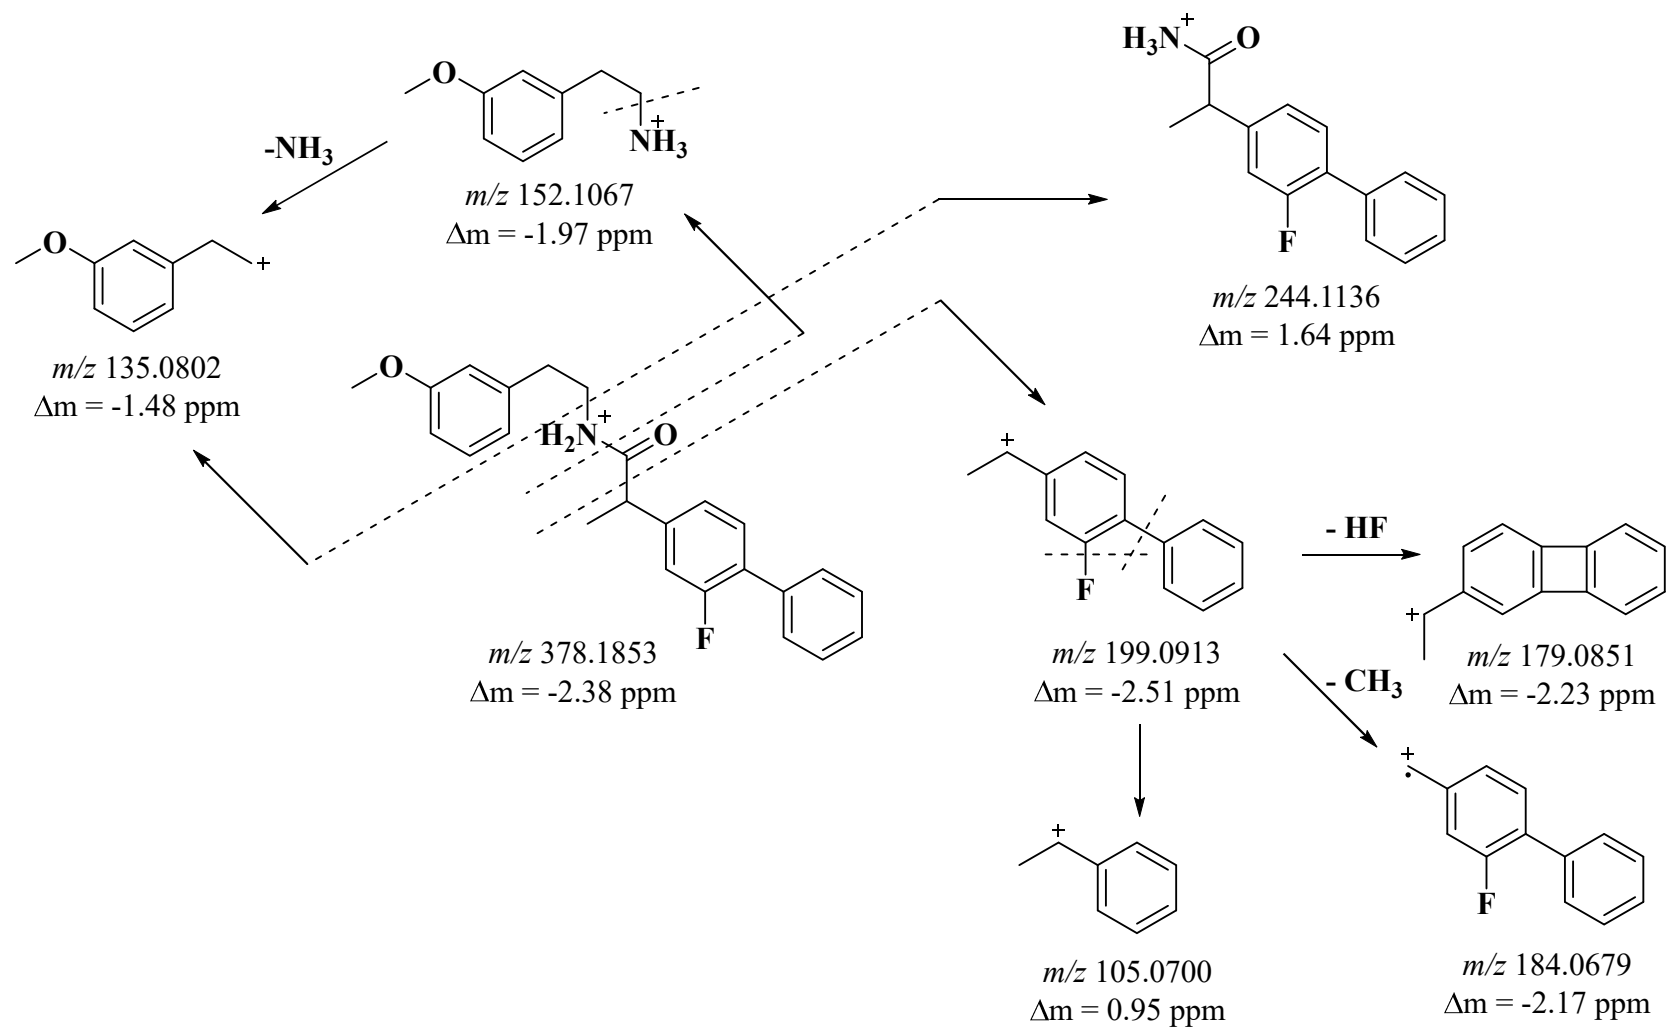

**Figure S21.** Proposed fragmentation of protonated **4b**.

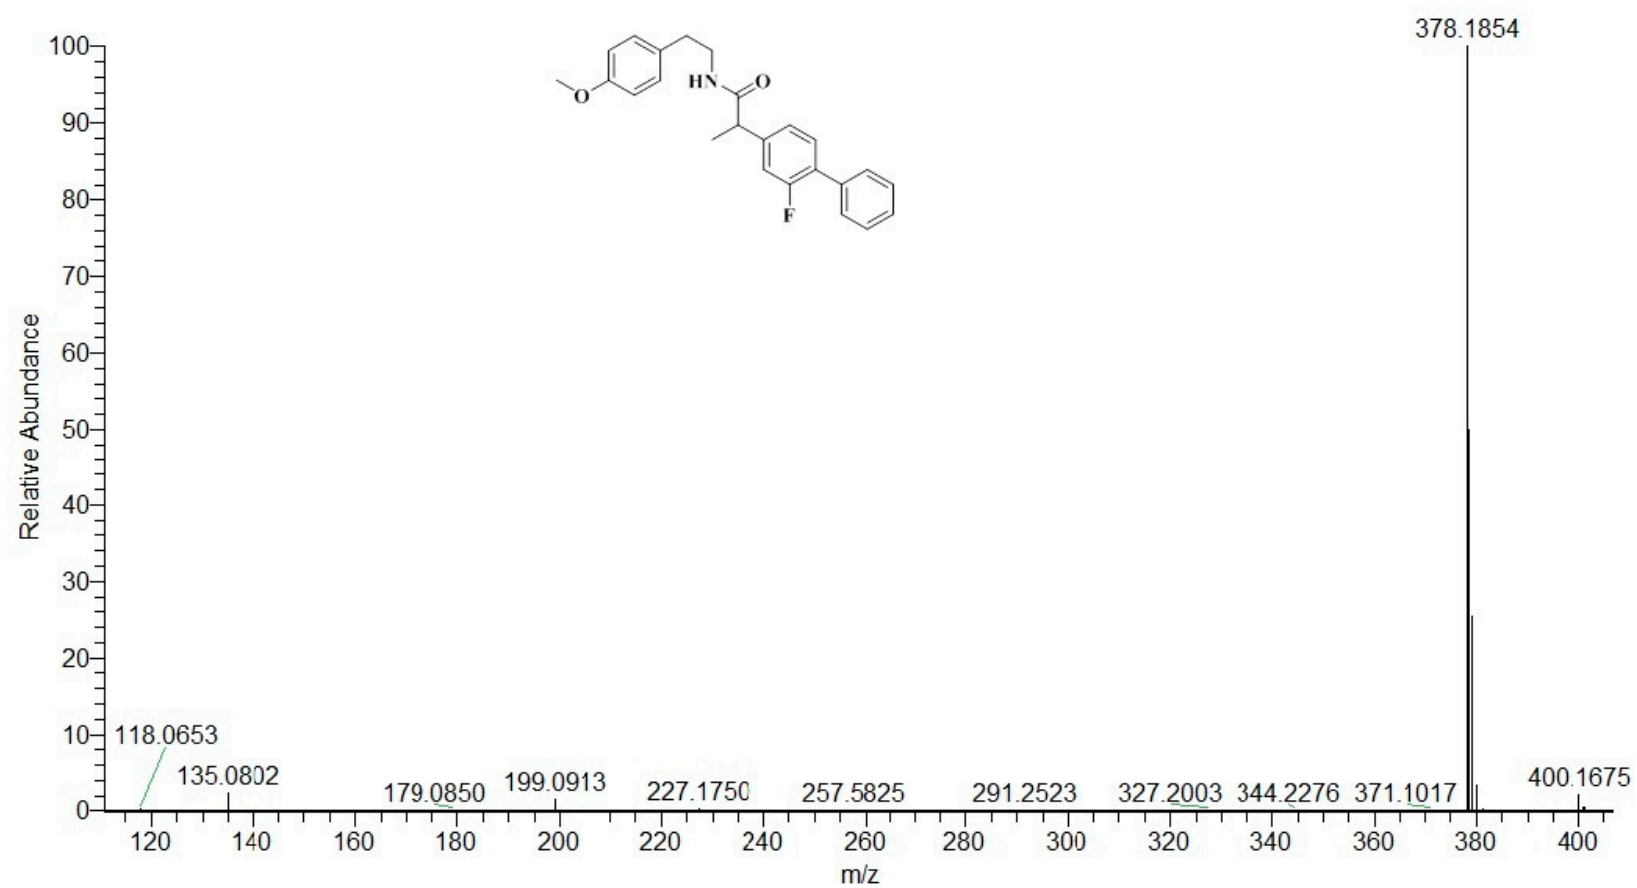

**Figure S22.** ESI-HRMS of compound **4c**.



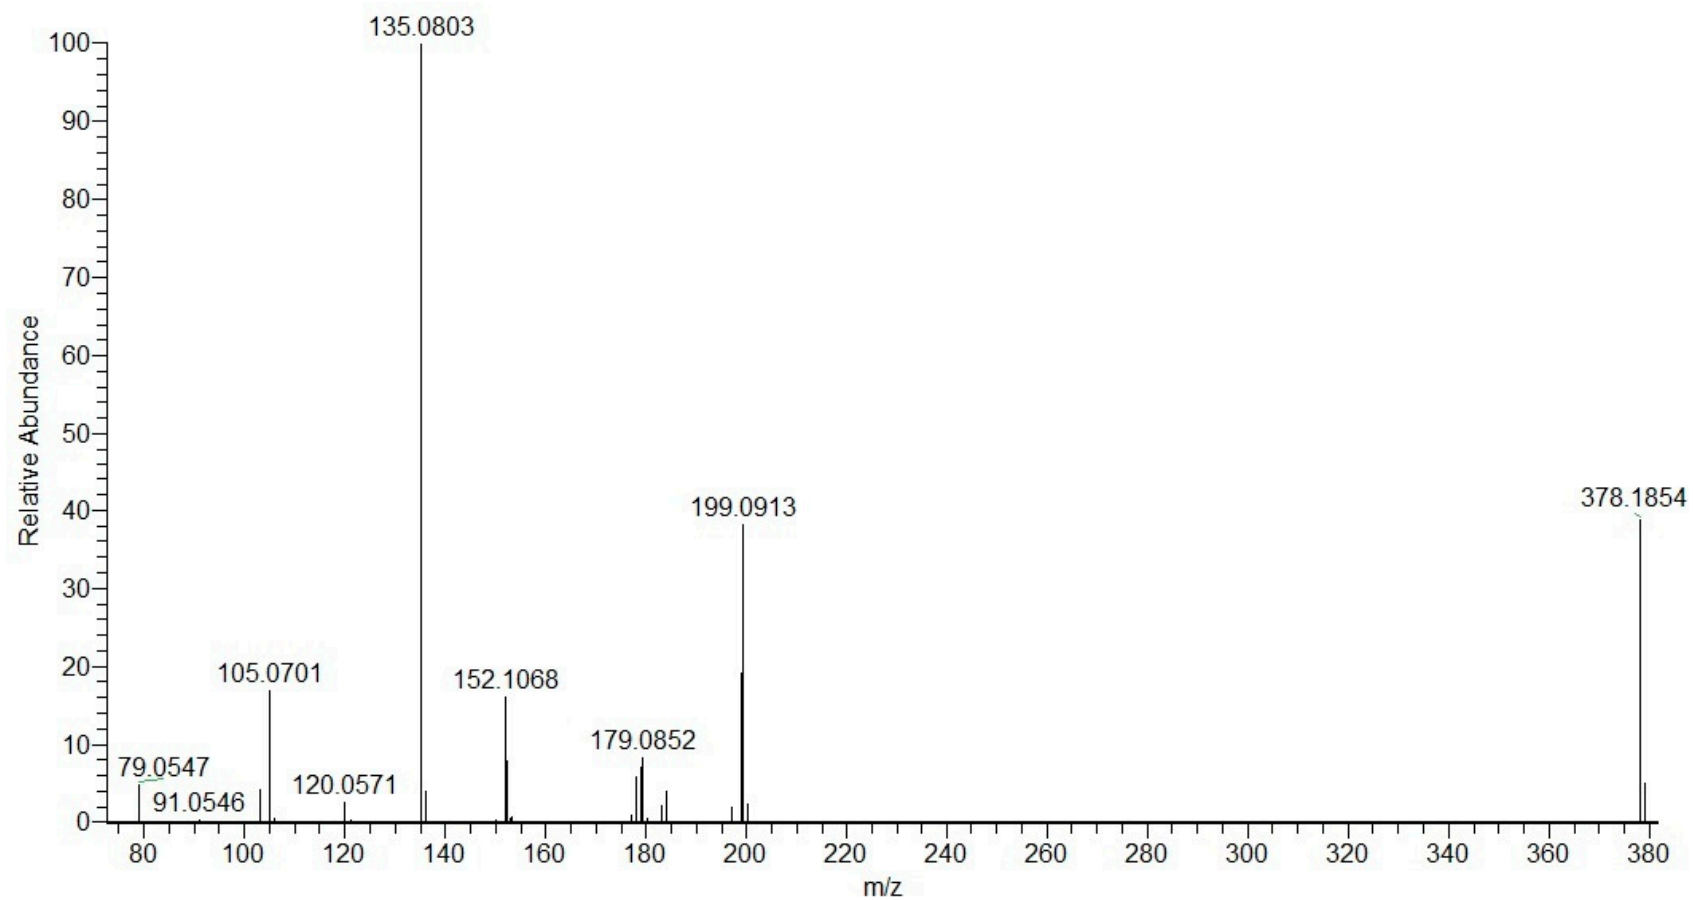

**Figure S23.** Mass spectrum of **4c** obtained by positive ion ESI-MS/MS.

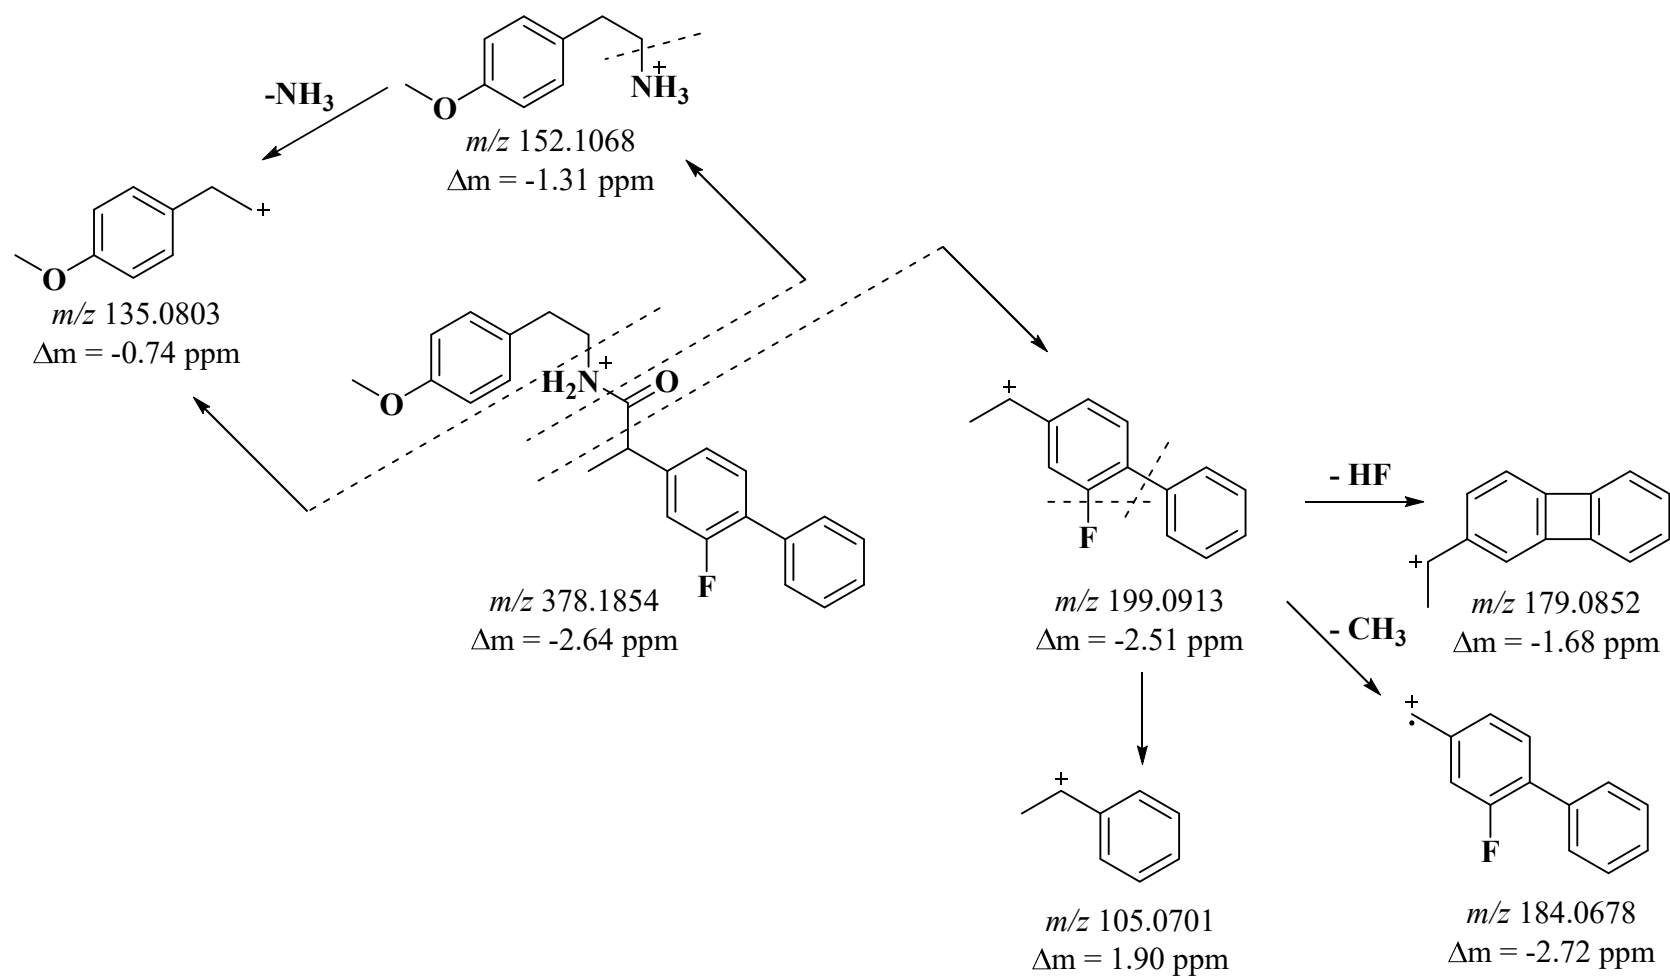

**Figure S24.** Proposed fragmentation of protonated **4c**.

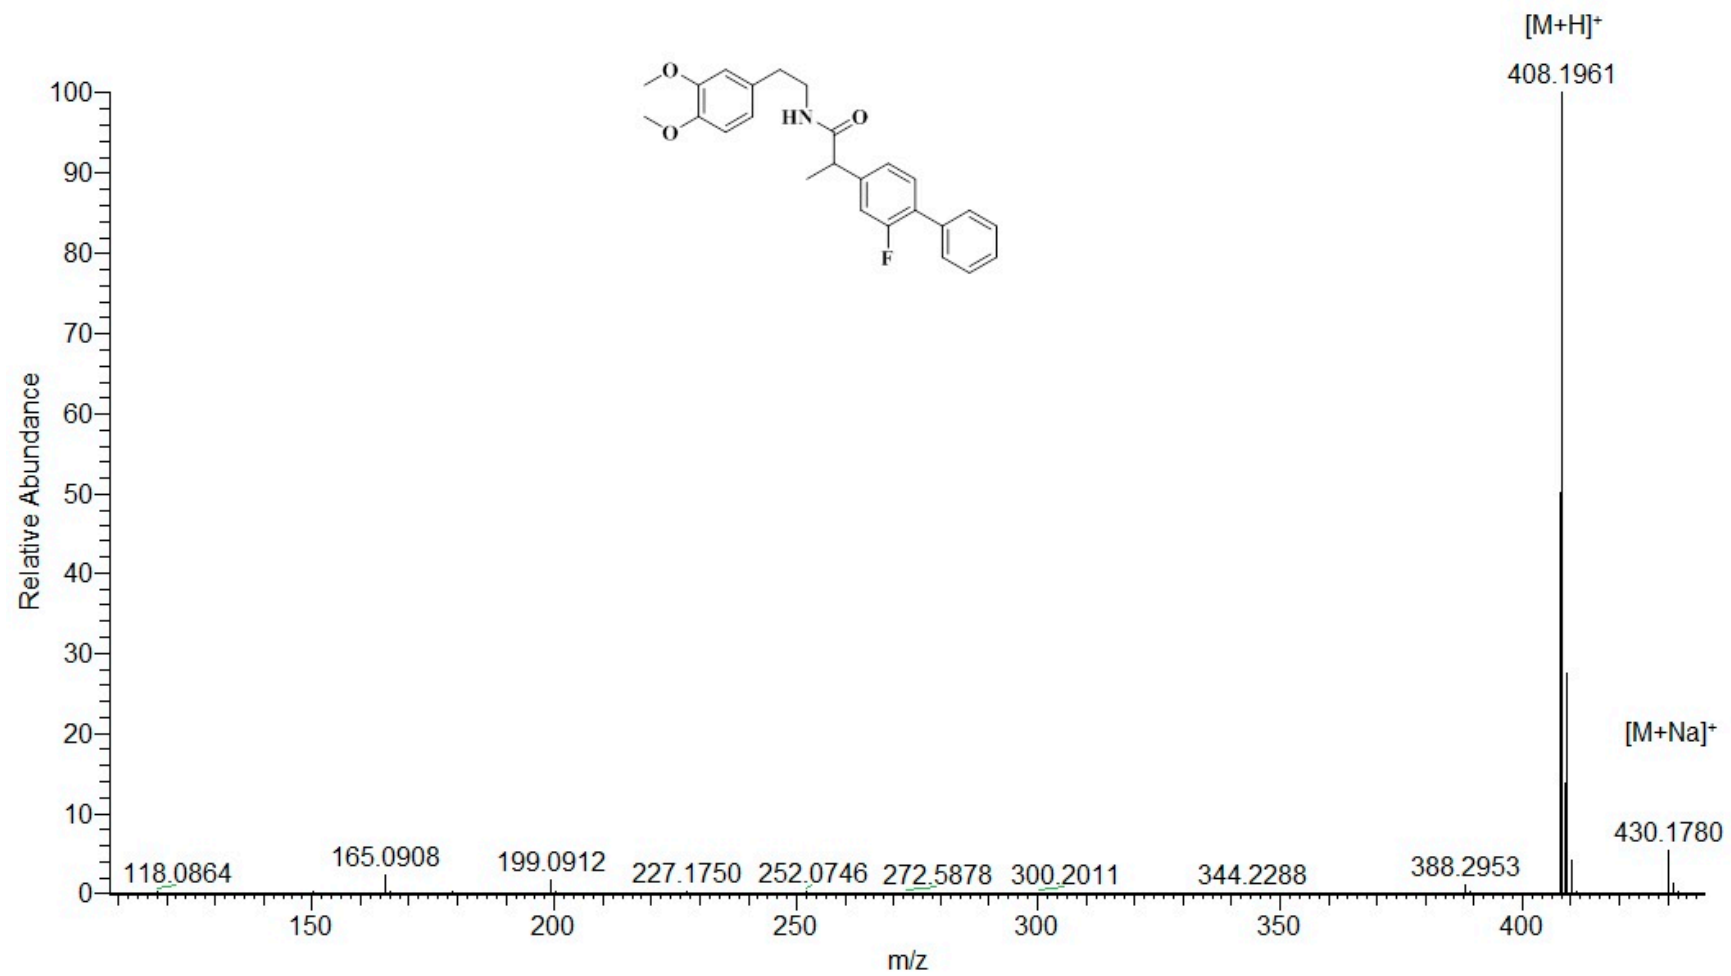

**Figure S25.** ESI-HRMS of compound **4d**.

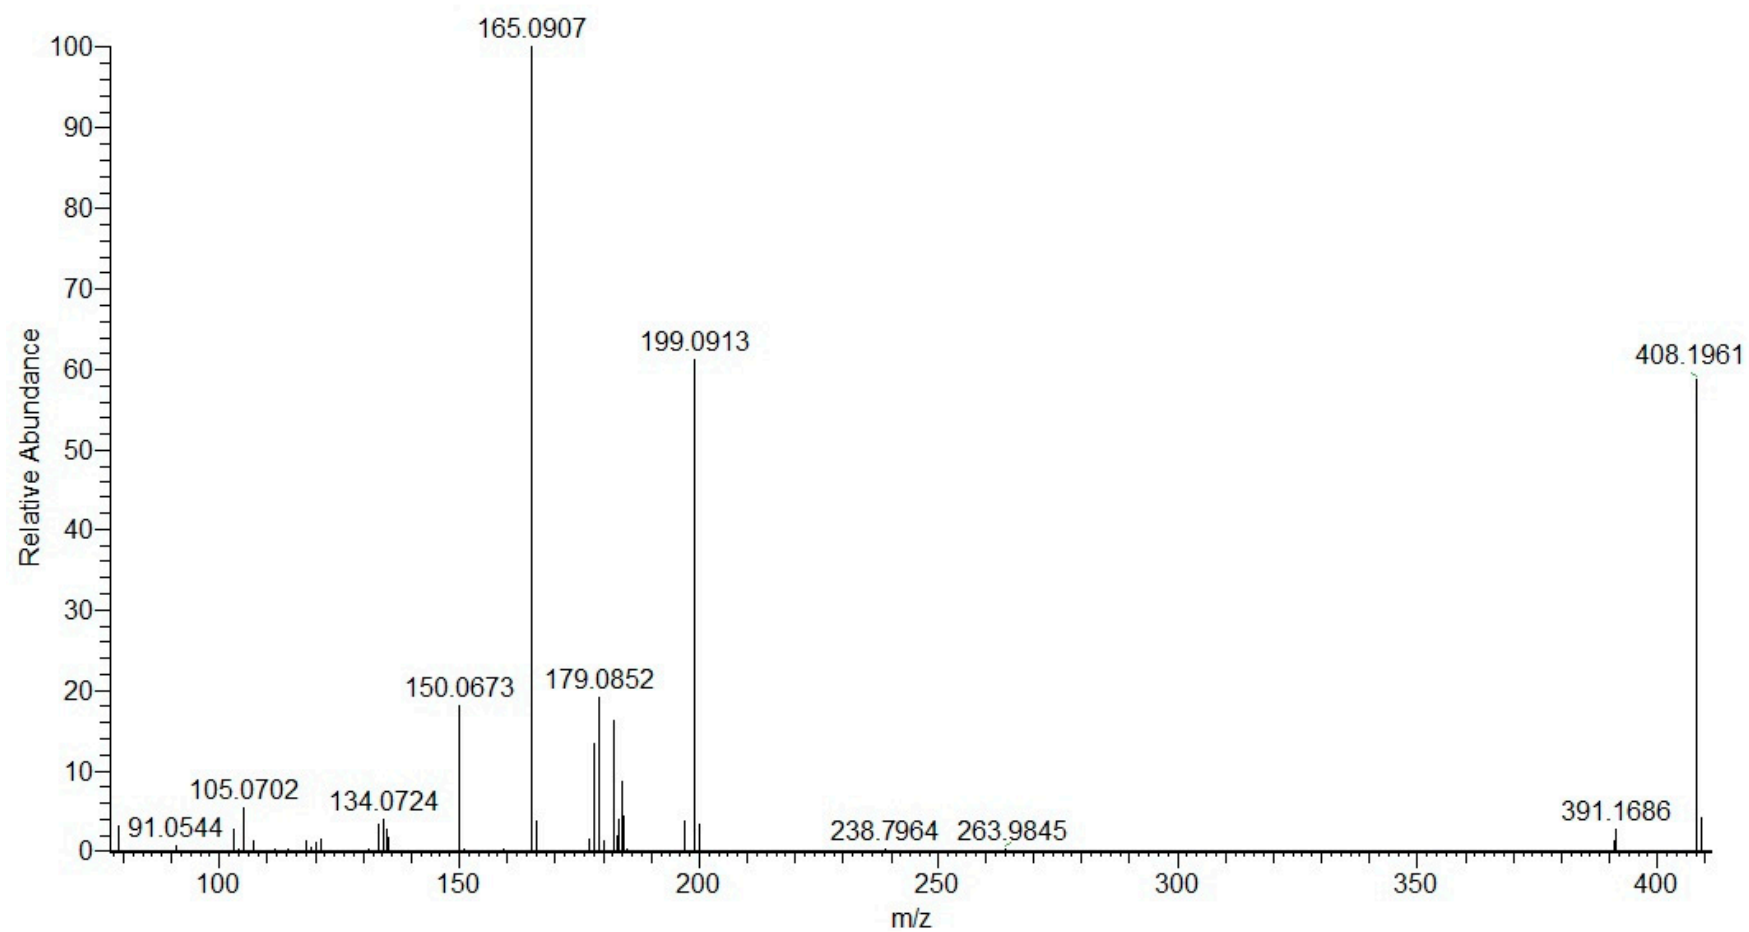

**Figure S26.** Mass spectrum of **4d** obtained by positive ion ESI-MS/MS.

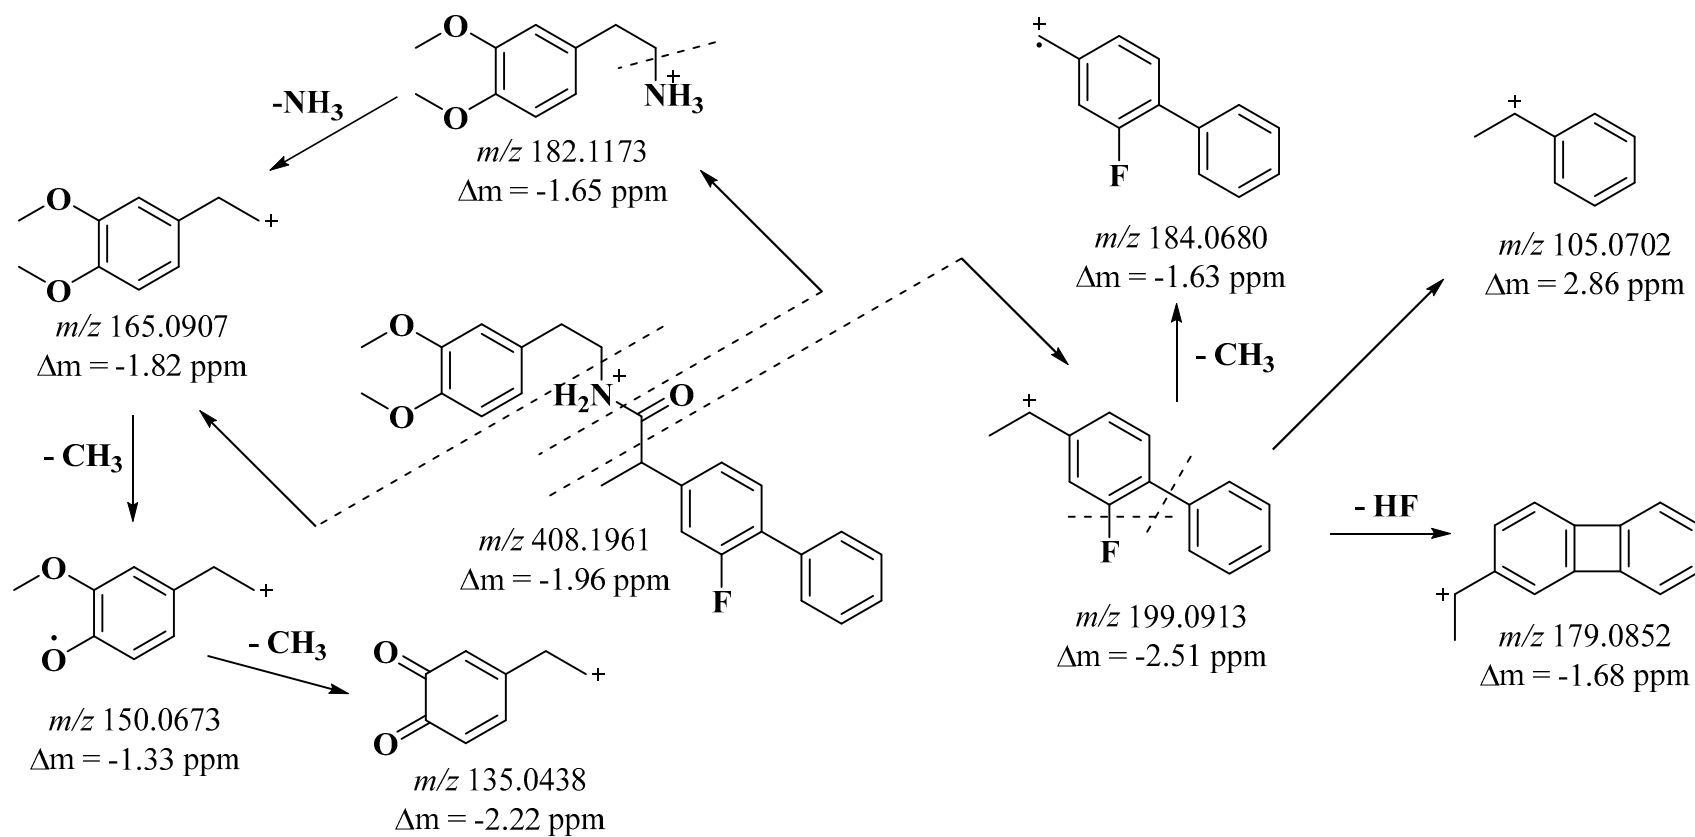

**Figure S27.** Proposed fragmentation of protonated **4d**.

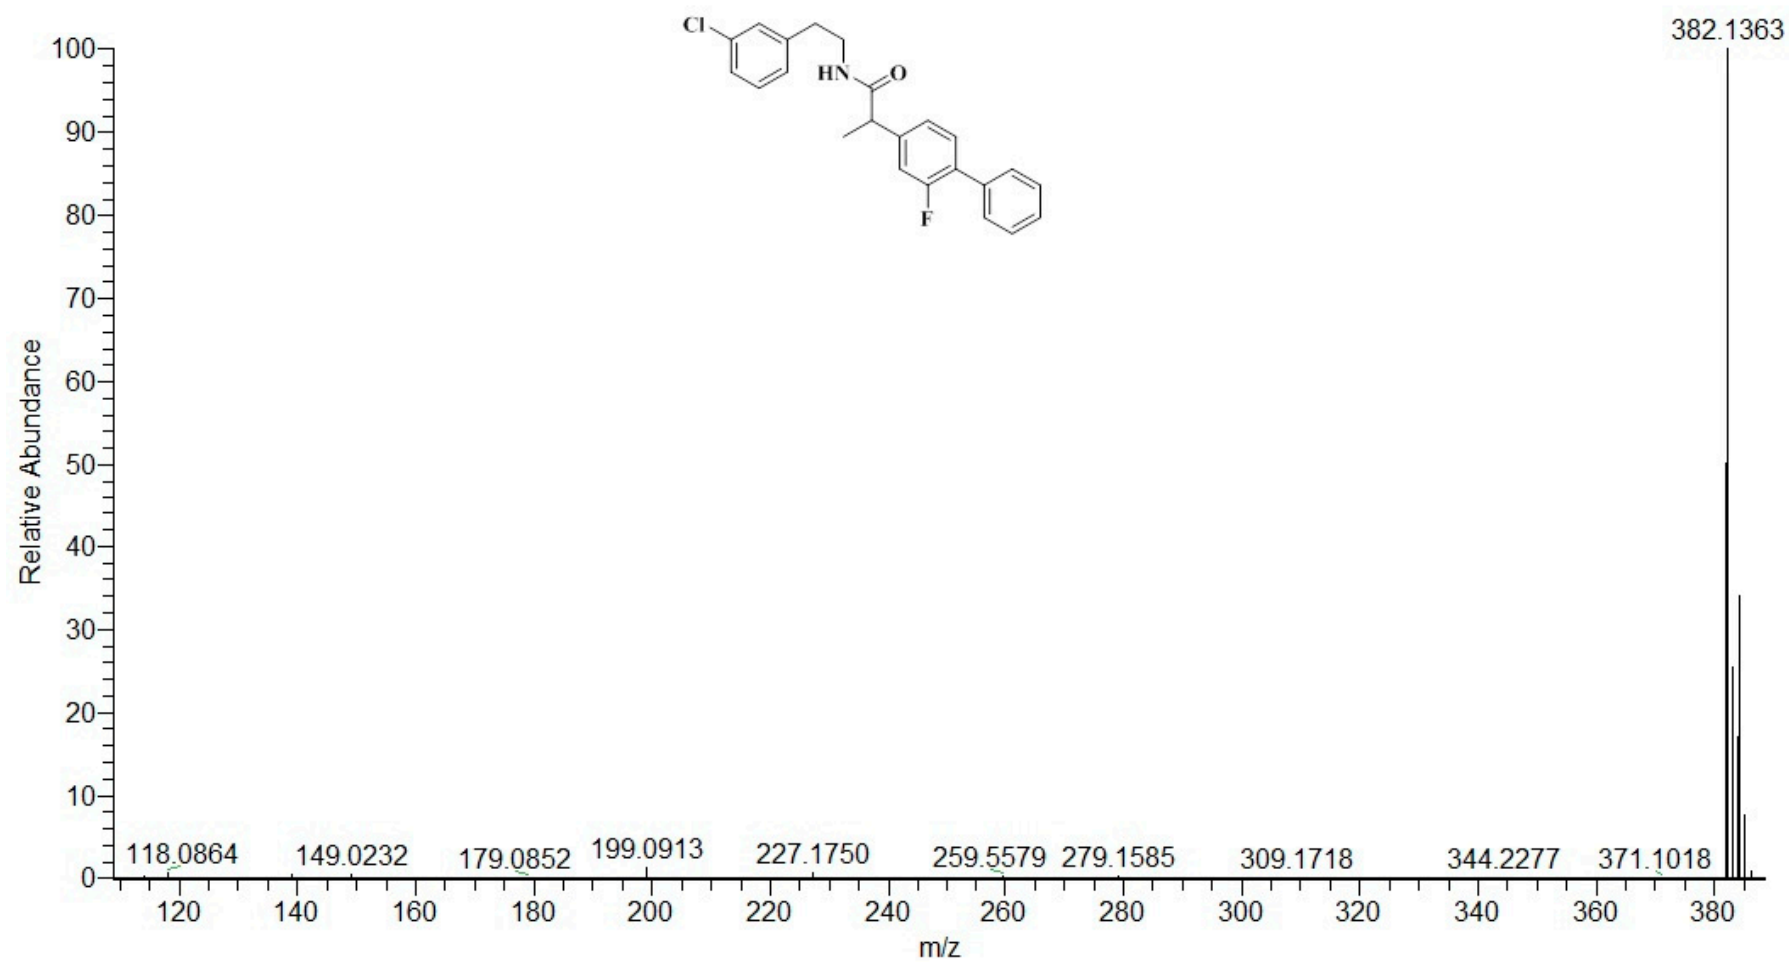

**Figure S28.** ESI-HRMS of compound **4e**.

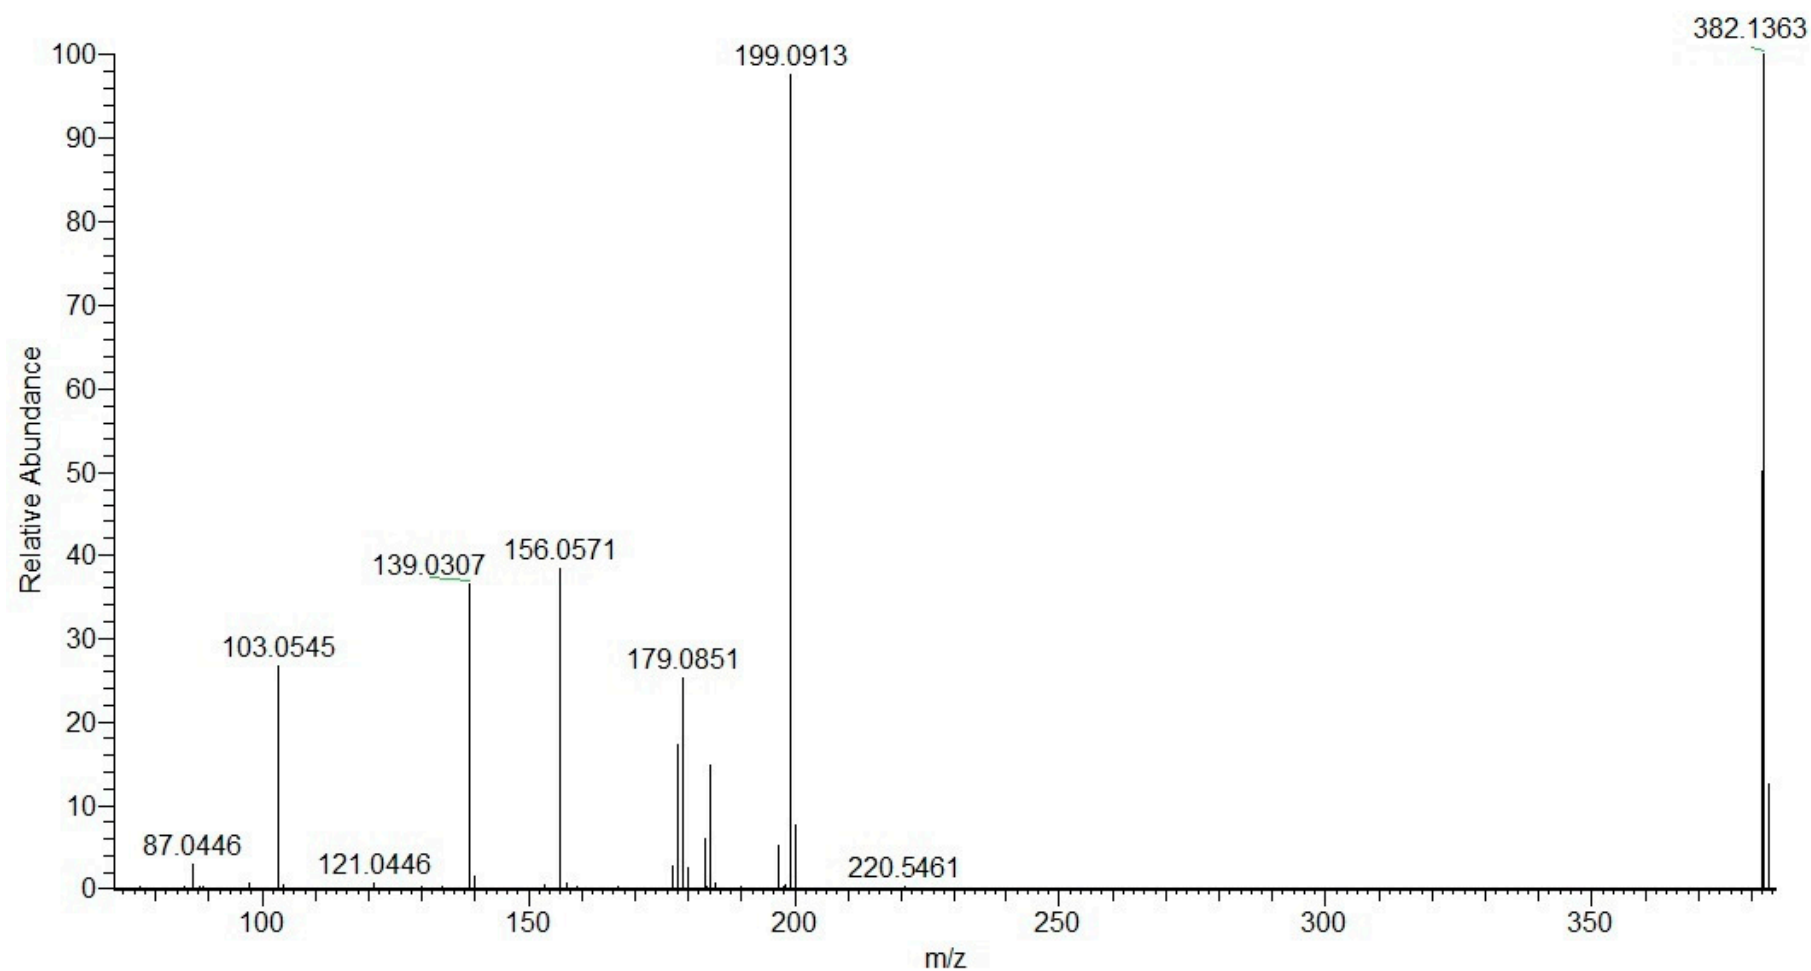

**Figure S29.** Mass spectrum of **4e** obtained by positive ion ESI-MS/MS.

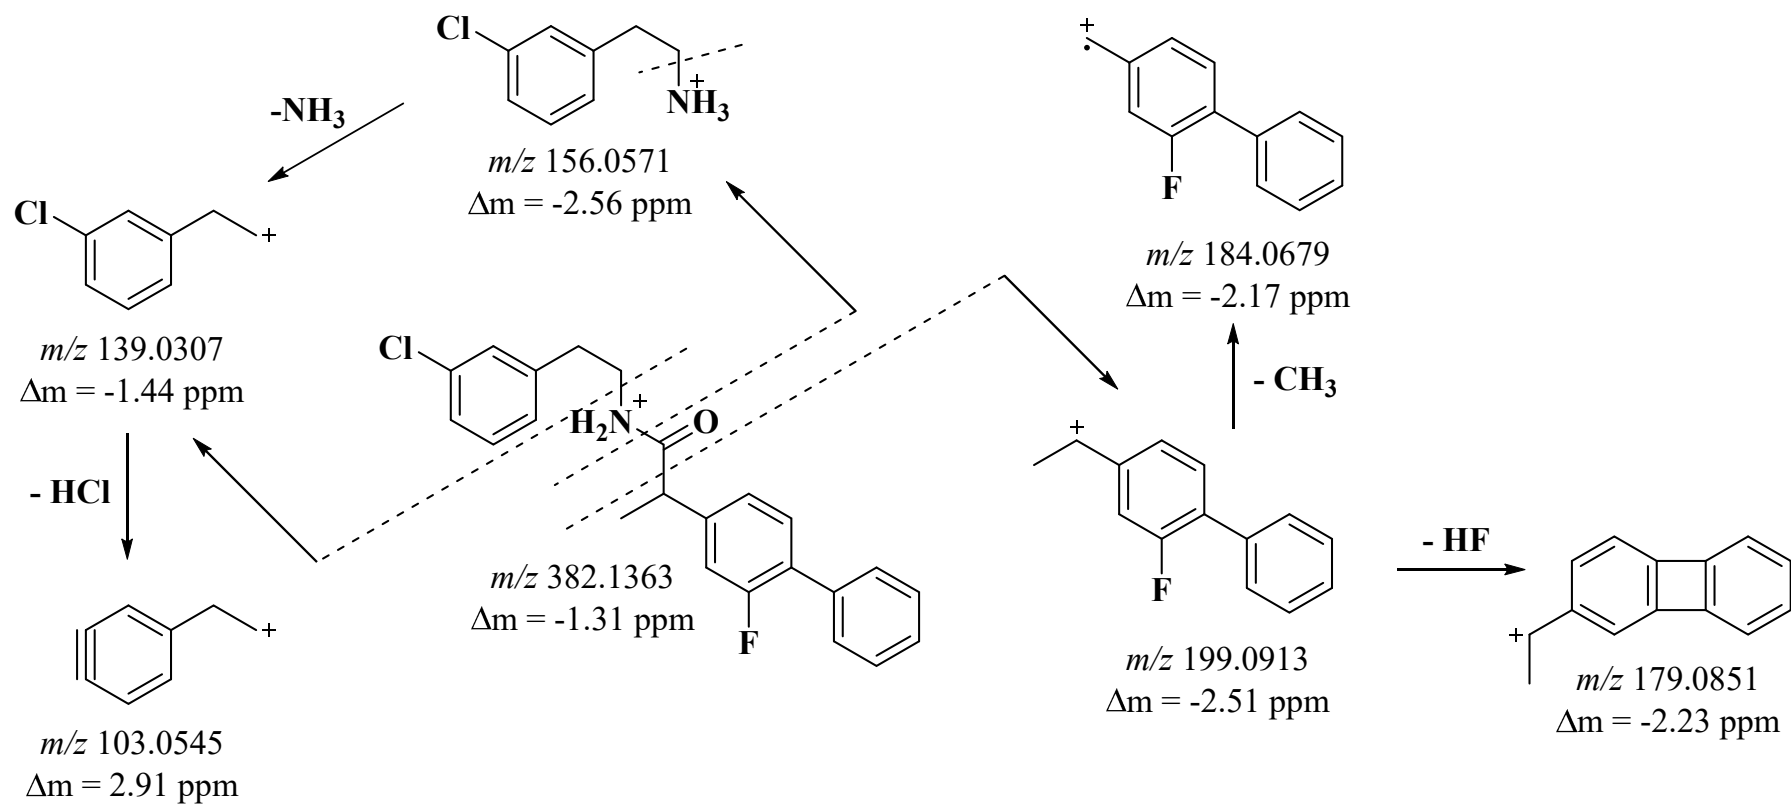

**Figure S30.** Proposed fragmentation of protonated **4e**.
